# Supplementary material for: Impact of psoriasis severity on patient-reported clinical symptoms, health-related quality of life and work productivity among US patients: real-world data from the Corrona Psoriasis Registry
Source: PubMed Central journal article supplement — BMJ Open. 2019 Apr 20;9(4):e027535. doi: 10.1136/bmjopen-2018-027535 (PMC6500315; doi:10.1136/bmjopen-2018-027535), 2019-04-20
Supplement: bmjopen-2018-027535.draft_revisions.pdf [file bmjopen-2018-027535.draft_revisions.pdf]

# BMJ Open

BMJ Open is committed to open peer review. As part of this commitment we make the peer review history of every article we publish publicly available.

When an article is published we post the peer reviewers' comments and the authors' responses online. We also post the versions of the paper that were used during peer review. These are the versions that the peer review comments apply to.

The versions of the paper that follow are the versions that were submitted during the peer review process. They are not the versions of record or the final published versions. They should not be cited or distributed as the published version of this manuscript.

BMJ Open is an open access journal and the full, final, typeset and author-corrected version of record of the manuscript is available on our site with no access controls, subscription charges or pay-per-view fees (<http://bmjopen.bmj.com>).

If you have any questions on BMJ Open's open peer review process please email [info.bmjopen@bmj.com](mailto:info.bmjopen@bmj.com)

# BMJ Open

## Impact of psoriasis severity on patient-reported clinical symptoms, health-related quality of life, and work productivity among US patients: real-world data from the Corrona Psoriasis Registry

|                               |                                                                                                                                                                                                                                                                                                                                                                                                                                                                                                                |
|-------------------------------|----------------------------------------------------------------------------------------------------------------------------------------------------------------------------------------------------------------------------------------------------------------------------------------------------------------------------------------------------------------------------------------------------------------------------------------------------------------------------------------------------------------|
| Journal:                      | <i>BMJ Open</i>                                                                                                                                                                                                                                                                                                                                                                                                                                                                                                |
| Manuscript ID                 | bmjopen-2018-027535                                                                                                                                                                                                                                                                                                                                                                                                                                                                                            |
| Article Type:                 | Research                                                                                                                                                                                                                                                                                                                                                                                                                                                                                                       |
| Date Submitted by the Author: | 20-Nov-2018                                                                                                                                                                                                                                                                                                                                                                                                                                                                                                    |
| Complete List of Authors:     | Strober, Bruce; University of Connecticut Health Center; Probity Medical Research<br>Greenberg, Jeffrey; Corrona LLC; NYU School of Medicine<br>Karki, Chitra; Corrona LLC<br>Mason, Marc; Corrona LLC<br>Guo, Ning; Corrona LLC<br>Hur, Peter; Novartis Pharmaceuticals Corporation<br>Zhao, Yang; Novartis Pharmaceuticals Corporation<br>Herrera, Vivian; Novartis Pharmaceuticals Corporation<br>Lin, Feng; Novartis Pharmaceuticals Corporation<br>Lebwohl, Mark; Icahn School of Medicine at Mount Sinai |
| Keywords:                     | Psoriasis < DERMATOLOGY, Disease Severity, Health-related Quality of Life, Patient-reported Outcomes, Work Productivity                                                                                                                                                                                                                                                                                                                                                                                        |
|                               |                                                                                                                                                                                                                                                                                                                                                                                                                                                                                                                |

SCHOLARONE™  
Manuscripts

1  
2  
3 **Impact of psoriasis severity on patient-reported clinical symptoms, health-related quality**  
4 **of life, and work productivity among US patients: real-world data from the Corrona**  
5

6  
7 **Psoriasis Registry**  
8

9  
10 **Authors:** Bruce Strober, MD, PhD<sup>1</sup>; Jeffrey D Greenberg, MD, MPH<sup>2,3</sup>; Chitra Karki, MPH<sup>2†</sup>;  
11  
12 Marc Mason, MS; Ning Guo, MS<sup>2</sup>; Peter Hur, PharmD, MBA<sup>4</sup>; Yang Zhao, PhD<sup>4\*</sup>; Vivian  
13  
14 Herrera, DDS, MPH<sup>4</sup>; Feng Lin, PhD<sup>4\*</sup>; Mark Lebwohl, MD<sup>5</sup>  
15  
16  
17  
18

19 <sup>1</sup>University of Connecticut Health Center, Farmington, CT, USA and Probitry Medical Research,  
20  
21 Waterloo, ON, Canada; <sup>2</sup>Corrona, LLC, Waltham, MA, USA; <sup>3</sup>NYU School of Medicine, New  
22  
23 York, NY, USA; <sup>4</sup>Novartis Pharmaceuticals Corporation, East Hanover, NJ, USA; <sup>5</sup>Icahn School  
24  
25 of Medicine at Mount Sinai, New York, NY, USA  
26  
27

28 \*Formerly of Novartis Pharmaceuticals Corporation  
29

30 †Formerly of Corrona, LLC  
31  
32  
33  
34

35 **Correspondence**  
36

37 Bruce Strober, MD, PhD  
38

39 Department of Dermatology, University of Connecticut Health Center, 21 South Rd, 2nd Floor,  
40  
41

42 Farmington, CT 06032, USA  
43

44 Telephone: 860-679-7692  
45

46 E-mail: strober@uchc.edu  
47  
48  
49  
50  
51  
52  
53

54 **Conflict of interest disclosure**  
55  
56  
57  
58  
59  
60

1  
2  
3 Dr. Strober has served as a consultant for AbbVie, Almirall, Amgen, Boehringer Ingelheim,  
4 Bristol-Myers-Squibb, Celgene, Dermavant, Dermira, Janssen, Leo, Eli Lilly, Leo, Medac, Meiji  
5  
6 Seika Pharma, Sebela Pharmaceuticals, Menlo Therapeutics, Novartis, Pfizer, GlaxoSmithKline,  
7  
8 UCB Pharma, Sirtris, Sun Pharma, Ortho Dermatologics/Valeant, Regeneron, Sanofi-Genzyme;  
9  
10 as an investigator for AbbVie, Celgene, Eli Lilly, Janssen, Merck, Boehringer Ingelheim,  
11  
12 GlaxoSmithKline, Pfizer, Galderma, and Sienna; as Co-scientific Director of the Corrona  
13  
14 Psoriasis Registry; and has received grant support for the University of Connecticut fellowship  
15  
16 program from AbbVie, Janssen, and the National Psoriasis Foundation. Dr. Lebwohl is an  
17  
18 employee of Mount Sinai and receives research funds from: Abbvie, Boehringer Ingelheim,  
19  
20 Celgene, Eli Lilly, Incyte, Janssen/Johnson & Johnson, Leo Pharmaceuticals, Medimmune/Astra  
21  
22 Zeneca, Novartis, Pfizer, Sciderm, Valeant, and ViDac. Dr. Lebwohl is also a consultant for  
23  
24 Allergan, Aqua, Boehringer Ingelheim, Corrona, LEO Pharma, Menlo, and Promius. Dr.  
25  
26 Greenberg is an employee and shareholder of Corrona, LLC, and has been a consultant to  
27  
28 Genentech, Janssen, Novartis, Pfizer, and Eli Lilly. Mr. Mason is an employee of Corrona, LLC,  
29  
30 and at the time of the study, was a member of the University of Delaware, Dept. of Behavioral  
31  
32 Health and Nutrition Affiliate Faculty (non-remunerative position). Ms. Guo is an employee of  
33  
34 Corrona, LLC, and Ms. Karki was an employee of Corrona, LLC, at the time of the study. Drs.  
35  
36 Herrera and Dr. Hur are employees of Novartis, and Dr. Zhao and Dr. Lin were employees of  
37  
38 Novartis at the time of the study.  
39  
40  
41  
42  
43  
44  
45

46 **Running head:** Psoriasis Severity and Quality of Life  
47  
48  
49  
50  
51  
52  
53  
54  
55  
56  
57  
58  
59  
60

## ABSTRACT

**Objectives:** This analysis examined the association between psoriasis severity, assessed by body surface area (BSA) and the Investigator's Global Assessment (IGA; previously used only in clinical trials) and patient-reported outcomes (PROs) in a real-world setting.

**Design:** Cross-sectional analysis within the Corrona Psoriasis Registry, an independent, prospective registry

**Setting:** 70 dermatology practices in the United States by May 31, 2016

**Participants:** 1529 adult patients with psoriasis being treated with biologic or nonbiologic systemic psoriasis treatment by May 31, 2016

**Primary and secondary outcome measures:** Psoriasis severity was assessed by percentage of affected BSA (mild [0–5%], moderate [>5–10%], severe [>10–15%], very severe [>15%]), and IGA scores (clear/almost clear [0–1], mild [2], moderate [3], severe [4]). PROs (pain, itch, fatigue; Dermatology Life Quality Index [DLQI]; EuroQoL Visual Analog Scale [EQ-VAS]; Work Productivity and Activity Impairment [WPAI]) were compared across BSA and IGA levels using ANOVA and chi-square tests. The association between psoriasis severity and PROs was examined using multivariable regression models.

**Results:** The mean age was 50.6 years and 47% of patients were female. Consistently, symptoms worsened, DLQI scores increased, EQ-VAS decreased, and WPAI scores increased with more severe disease when assessed by BSA and IGA. By BSA score, moderate to very severe psoriasis was associated with poorer outcomes for the “impairment while working” and “daily activities compared” WPAI domains. Very severe psoriasis was associated with increased “work hours missed” and “work hours affected.” Findings were similar by IGA. Results were confirmed by multivariable regression analyses.

1  
2  
3 **Conclusions:** In a real-world setting, more severe psoriasis, assessed by BSA and IGA, was  
4 consistently associated with worse PROs.  
5  
6  
7  
8  
9

### 10 **Strengths and limitations of this study**

- 11 - This is the first study to explore the link between psoriasis severity measured by the  
12 Investigator's Global Assessment (IGA) and patient reported outcomes (PROs) in a real-  
13 world setting  
14
- 15 - Due to the cross-sectional study design, causal inferences regarding the relationship  
16 between psoriasis severity and PROs cannot be made, and changes in psoriasis severity or  
17 PROs over time were not measured  
18
- 19 - Patients were recruited from specific dermatology practices, which may have been more  
20 focused on psoriasis therapy and, therefore, may not be representative of the general US  
21 psoriasis population  
22  
23  
24  
25  
26  
27  
28  
29  
30  
31  
32  
33  
34

35 **Keywords:** Psoriasis – Disease Severity – Health-related Quality of Life – Patient-reported  
36 Outcomes – Work Productivity  
37

### 38 **INTRODUCTION**

39  
40  
41  
42 Psoriasis is a chronic, immune-mediated, systemic, inflammatory, and often debilitating skin  
43 disease, affecting 2.6%–3.7% of the population in the United States (US).<sup>1</sup> With itching, pain,  
44 and scaling as its key symptoms, psoriasis can have a significant impact on patients' health-  
45 related quality of life (QoL) and work productivity, depending on disease severity.<sup>2–4</sup>  
46  
47  
48  
49

50  
51 A growing body of real-world evidence has shown greater psoriasis severity is associated with  
52 worse QoL and higher impairments in work productivity.<sup>4,5</sup> Survey data from the National  
53  
54  
55  
56  
57  
58  
59  
60  
Psoriasis Foundation in the US revealed patients with severe psoriasis had a greater likelihood of

1  
2  
3 being unemployed than those having mild disease.<sup>5</sup> In another US survey, Korman and  
4 colleagues found increased psoriasis severity was associated with more itching, pain, and  
5 scaling; poorer QoL; and greater productivity impairment.<sup>4</sup>  
6  
7

8  
9  
10 However, methods of measuring psoriasis severity are not used consistently across studies.

11  
12 Affected body surface area (BSA) is a widely known and used measure of psoriasis severity in  
13 clinical practice,<sup>6,7</sup> and dermatologists prefer this tool for evaluating patient outcomes.<sup>7</sup> Although  
14 BSA has been used in studies of psoriasis-associated QoL, BSA-defined disease severity varies  
15 across studies (eg, no/little <1%, mild 1%–2%, severe  $\geq$ 3%, as used by the National Health and  
16 Nutrition Examination Survey<sup>8</sup> vs mild 0%–<3%, moderate 3%–<10%, severe  $\geq$ 10%, as used by  
17 the National Psoriasis Foundation<sup>5</sup>). In addition, using BSA alone does not capture information  
18 regarding disease location or symptoms.<sup>7</sup>  
19  
20  
21  
22  
23  
24  
25  
26  
27

28  
29 Several other severity measures exist, with their respective strengths and limitations. The  
30 Psoriasis Area and Severity Index (PASI) score is the most widely used and most thoroughly  
31 validated severity measure as a primary endpoint in clinical trials. However, it has not been  
32 employed routinely in clinical practice and tends to be poorly understood by clinicians and  
33 patients.<sup>6,9,10</sup> In addition, it shows low sensitivity to changes in disease severity in cases with low  
34 BSA involvement (ie, <10%).<sup>6</sup> The physician's global assessment (PGA) has been described as  
35 being easier to understand compared with the PASI and more similar to assessments of disease  
36 used in clinical practice.<sup>10</sup> However, definitions and criteria for points within the PGA values  
37 lack standardization, and expert consensus has not yet been reached.<sup>9</sup> Further, a large  
38 discordance may exist between PGA and BSA, resulting in either an over- or underestimate of  
39 true disease severity.<sup>11</sup>  
40  
41  
42  
43  
44  
45  
46  
47  
48  
49  
50  
51  
52

53  
54 The 5-point investigator's global assessment (IGA) modified (mod) 2011 scale is typically used  
55 in clinical trials and gauges psoriasis severity according to the patient's degree of skin redness,  
56  
57  
58  
59

1  
2  
3 thickening, and scaling. Its advantage over other tools (6-point IGA and PGA) is that it more  
4 narrowly defines the lowest level of disease severity.<sup>9</sup> However, the IGA mod 2011 scale has not  
5  
6 been examined in real-world studies of psoriasis-associated QoL.  
7  
8

9  
10 Although the IGA mod 2011 scale provides a useful framework for the assessment of disease  
11 features, use of this scale alone and without accounting for BSA may not accurately reflect  
12 disease severity. In clinical practice, physicians may use a combination of objective assessments  
13 of psoriasis severity, such as the IGA mod 2011 scale, BSA, and symptoms, and more subjective  
14 measures, such as the emotional impact of psoriasis on the patient.<sup>6</sup>  
15  
16

17 This analysis aims to define the relationship between psoriasis severity and symptom severity,  
18 QoL, and work productivity among US patients with psoriasis in a real-world setting. Separate  
19 analyses were conducted, with psoriasis severity defined using both BSA and IGA.  
20  
21

## 22 **METHODS**

### 23 **Study Design**

24 A cross-sectional study was conducted using the enrollment data from the Corrona Psoriasis  
25 Registry to identify associations between disease severity and patient-reported outcomes (PROs).  
26  
27

### 28 **Patient and Public Involvement**

29 Patients were not involved in determining the design, the recruitment to, or the conduct of this  
30 study. All patients enrolled in the Corrona Psoriasis Registry receive a patient newsletter that  
31 shares study results twice per year.  
32  
33

### 34 **Data Source**



1  
2  
3 The Corrona Psoriasis Registry is an independent, prospective observational cohort launched in  
4 April 2015 in collaboration with the National Psoriasis Foundation, with a target enrollment of  
5 10,000 patients with psoriasis from 200 sites throughout the US. The study inclusion criteria  
6 matched those for registry enrollment: Patients must be at least 18 years old, must have been  
7 given a psoriasis diagnosis by a dermatologist, and had to have begun treatment with a qualifying  
8 biologic or nonbiologic systemic psoriasis treatment either within the 12 months preceding or on  
9 the day of the enrollment visit. Data collected from the registry launch date (April 2015) through  
10 May 31, 2016 were analyzed for the study.  
11  
12  
13  
14  
15  
16  
17  
18  
19  
20  
21  
22  
23

## 24 **Study Measures**

25  
26 Data related to demographics, disease severity (BSA and IGA scores), disease duration, prior and  
27 current use of systemic treatments for psoriasis, physician-reported medical history (eg,  
28 cardiovascular disease, diabetes mellitus, cardiovascular disease and diabetes risk factors,  
29 lymphoma/malignancy, Crohn's disease, anxiety/depression), and PROs collected at registry  
30 enrollment were examined. Patients reported their levels of pain, itching, and fatigue on a visual  
31 analog scale (VAS) of 0 (none) to 100 (very severe) and completed 2 validated and commonly  
32 used health-related quality-of-life (HRQoL) assessment instruments: the Dermatology Life  
33 Quality Index (DLQI)<sup>12</sup> and the visual analog component of the EuroQoL Five Dimensions  
34 Questionnaire VAS (EQ-VAS).<sup>13</sup> In addition, the patients completed the Work Productivity and  
35 Activity Impairment (WPAI) questionnaire.<sup>14</sup> Dermatologists assessed disease severity in terms  
36 of the percentage of total BSA affected and/or the IGA mod 2011 scale score. BSA percentages  
37 were categorized as mild (0–5%), moderate (>5–10%), severe (>10–15%), and very severe  
38 (>15%). The 5-point IGA was used to categorize levels of skin induration, scaling, and redness  
39 as clear/almost clear (0–1), mild (2), moderate (3), and severe (4).  
40  
41  
42  
43  
44  
45  
46  
47  
48  
49  
50  
51  
52  
53  
54  
55  
56  
57  
58  
59  
60

### Dermatology Life Quality Index

The DLQI, which is a dermatology-specific tool to measure HRQoL, requires respondents to answer 10 questions classified within 6 domains: symptoms and feelings, daily activities, leisure activities, work and school, personal relationships, and treatment. Respondents indicate the degree to which they experienced problems for a recall period of 1 week, and responses are assessed with a 4-point Likert scale: 0 (not at all/not relevant), 1 (a little), 2 (a lot), and 3 (very much). Responses are calculated for the total DLQI score, which is 0–30. Higher scores indicate worse HRQoL.

### EuroQol Visual Analog Scale

The EuroQol Visual Analog Scale (EQ-VAS) is a non-disease-specific HRQoL assessment tool in which respondents indicate their state of health on the day of assessment on a scale of 0–100, with 100 being the best imaginable state of health and 0 being the worst imaginable state of health.

### Work Productivity and Activity Impairment

The WPAI questionnaire measures impairment in work hours missed, work productivity and impairment, and daily activities. Based on a scale of 1 (no effect) to 10 (completely prevented patient from working/participating), respondents report the following domains for the previous week: work hours missed, work hours affected, impairment while working, and daily activities impaired. Daily activities include housework, shopping, exercise, and studying. Responses for all domains, except for daily activities, are valid only if the respondent is employed.

## Statistical Analysis

Data regarding patient characteristics, disease characteristics, comorbidities, treatment history, and PROs collected at registry enrollment were reported for the overall study population and by BSA and IGA disease severity groups. Frequency counts and percentages were reported for all categorical variables (sex, employment status, disability status, psoriatic arthritis diagnosis, treatment history, and history of comorbidities). Means and standard deviations (SDs) were reported for all continuous variables (age, body mass index [BMI], psoriasis duration, BSA, and IGA). Significance testing with analysis of variance (ANOVA) was used for continuous variables, and chi-square tests of association were employed for categorical variables to investigate if any differences in values were present across the levels of BSA and IGA disease severity.

Multivariable linear regression was used to model the association between disease severity levels and PROs. To address potential confounding, the model adjusted a priori for age, gender, disease duration, and BMI at enrollment. IGA and BSA were modeled separately. Ordinal regression modeling was performed as a confirmatory sensitivity analysis.

Statistical analyses included patients who had complete data on analysis variables at enrollment. To minimize the potential impact of missing data, variables of interest were specified as “required” during data collection; therefore, no statistical techniques were needed to account for missing data. All analyses were performed using STATA (StataCorp LP 2015, Stata Statistical Software: Release 14, Version 2, College Station, TX) with significance set at the  $P < 0.05$  level.

## Protection of Patients

1  
2  
3 The study used blinded data to maintain patient confidentiality. The Corrona Psoriasis Registry  
4 was approved by both local and central review boards at the participating sites. All patients  
5 provided written informed consent prior to their enrollments in the registry.  
6  
7  
8  
9  
10

## 11 RESULTS

### 12 Study Sample Characteristics

13  
14  
15 As of May 31, 2016, 1529 patients were enrolled in the registry; the mean age was 50 years and  
16 47% were female. Among these patients, 1525 had complete BSA data and 1527 had complete  
17 IGA data, and the BSA and IGA patients were similar in age and gender types.  
18  
19  
20  
21

22 Similar proportions of patients were biologic experienced and had prior nonbiologic systemic  
23 therapy across disease severity groups (BSA and IGA). The proportion of patients who were  
24 biologic experienced ranged from 53%–59% across BSA categories and 53%–57% across IGA  
25 categories. Proportions of patients who had been treated with nonbiologic systemic therapies  
26 ranged from 45%–49% across BSA categories, and 42%–54% across IGA categories. The  
27 disease severity groups also had similar disease durations (**Table 1**).  
28  
29  
30  
31  
32  
33  
34  
35  
36  
37  
38  
39  
40  
41  
42  
43  
44  
45  
46  
47  
48  
49  
50  
51  
52  
53  
54  
55  
56  
57  
58  
59  
60

**Table 1. Baseline patient characteristics by BSA severity categories**

|                                                    | BSA Severity Groups (n = 1525) |                                  |                                     |                                      | IGA Severity Groups (n = 1527)                 |                      |                             |                        |
|----------------------------------------------------|--------------------------------|----------------------------------|-------------------------------------|--------------------------------------|------------------------------------------------|----------------------|-----------------------------|------------------------|
|                                                    | Mild:<br>0–5%<br>(n =<br>873)  | Moderate:<br>>5–10%<br>(n = 316) | Severe:<br>>10–<br>15%<br>(n = 109) | Very<br>Severe:<br>>15%<br>(n = 227) | Clear/<br>almost<br>clear:<br>0/1<br>(n = 375) | Mild: 2<br>(n = 404) | Moderate:<br>3<br>(n = 586) | Severe: 4<br>(n = 162) |
| <b>Patient characteristics</b>                     |                                |                                  |                                     |                                      |                                                |                      |                             |                        |
| Female, n (%)                                      | 439 (50)                       | 136 (43)                         | 53 (49)                             | 88 (39)                              | 186 (50)                                       | 205 (51)             | 262 (45)                    | 64 (40)                |
| Age (years), mean (SD)                             | 50.6<br>(14.4)                 | 50.8<br>(13.9)                   | 49.8<br>(14.8)                      | 50.4<br>(14.9)                       | 50 (14.3)<br>(14.8)                            | 51.5<br>(14.8)       | 50.7<br>(14.1)              | 49.5<br>(14.9)         |
| Body weight (kg), mean<br>(SD)                     | 87.5<br>(22.2)                 | 88.7<br>(24.8)                   | 92.3<br>(23.8)                      | 95.4<br>(27.3)                       | 85.6<br>(19.6)                                 | 89.6<br>(24.3)       | 90.0<br>(25.3)              | 94.1<br>(24.9)         |
| Body mass index (kg/m <sup>2</sup> ),<br>mean (SD) | 30.1<br>(6.8)                  | 30.2 (7.3)                       | 32.0 (8.1)                          | 32.2 (8.4)                           | 29.2 (5.7)                                     | 31.0 (7.6)           | 30.8 (7.7)                  | 32.0 (8.0)             |
| Employed, n (%)                                    | 575 (66)                       | 209 (67)                         | 72 (66)                             | 137 (61)                             | 261 (70)                                       | 258 (64)             | 374 (64)                    | 101 (63)               |

|                                          |                |                |                |                |                |                |                |                |
|------------------------------------------|----------------|----------------|----------------|----------------|----------------|----------------|----------------|----------------|
| Disabled, n (%)                          | 59 (7)         | 28 (9)         | 8 (7)          | 31 (14)        | 20 (5)         | 22 (5)         | 60 (10)        | 24 (15)        |
| <b>Disease characteristics</b>           |                |                |                |                |                |                |                |                |
| Psoriasis duration (years),<br>mean (SD) | 15.6<br>(13.8) | 15.1<br>(12.9) | 15.7<br>(13.7) | 17.2<br>(13.4) | 15.8<br>(13.2) | 17.0<br>(14.8) | 15.2<br>(13.2) | 14.1<br>(12.4) |
| Psoriatic arthritis<br>diagnosis, n (%)  | 369 (42)       | 120 (38)       | 37 (34)        | 90 (40)        | 152 (41)       | 165 (41)       | 223 (38)       | 78 (48)        |
| <b>Treatment history</b>                 |                |                |                |                |                |                |                |                |
| Biologic naïve, n (%)                    | 410 (47)       | 148 (47)       | 48 (44)        | 93 (41)        | 165 (44)       | 188 (47)       | 277 (47)       | 70 (43)        |
| Biologic experienced, n<br>(%)           | 463 (53)       | 168 (53)       | 61 (56)        | 134 (59)       | 210 (56)       | 216 (53)       | 309 (53)       | 92 (57)        |
| Nonbiologic systemic<br>therapy, n (%)   | 389 (45)       | 141 (45)       | 52 (48)        | 111 (49)       | 169 (45)       | 170 (42)       | 268 (46)       | 88 (54)        |
| <b>Psoriasis severity</b>                |                |                |                |                |                |                |                |                |
| BSA (%), mean (SD)                       | 2.2 (1.7)      | 8.3 (1.6)      | 13.4 (1.5)     | 34.8<br>(18.8) | 1.3 (3.3)      | 5.7 (8.5)      | 11.7<br>(12.1) | 26.6<br>(21.9) |
| IGA, mean (SD)                           | 1.7 (1.1)      | 2.8 (0.6)      | 3.1 (0.5)      | 3.3 (0.7)      | 0.6 (0.5)      | 2.0 (0.0)      | 3.0 (0.0)      | 4.0 (0.0)      |

| <b>History of comorbidities</b>                     |          |          |         |          |          |          |          |         |
|-----------------------------------------------------|----------|----------|---------|----------|----------|----------|----------|---------|
| Cardiovascular disease, n (%)                       | 103 (12) | 35 (11)  | 13 (12) | 30 (13)  | 48 (13)  | 52 (13)  | 66 (11)  | 16 (10) |
| Coronary artery disease, n (%)                      | 25 (3)   | 4 (1)    | 2 (2)   | 12 (5)   | 9 (2)    | 16 (4)   | 12 (2)   | 6 (4)   |
| Congestive heart failure, n (%)                     | 7 (1)    | 9 (3)    | 0 (0)   | 5 (2)    | 3 (1)    | 5 (1)    | 11 (2)   | 2 (1)   |
| Stroke, n (%)                                       | 15 (2)   | 3 (1)    | 2 (2)   | 1 (0)    | 6 (2)    | 8 (2)    | 6 (1)    | 1 (1)   |
| Cardiovascular disease/diabetes risk factors, n (%) | 413 (47) | 159 (50) | 51 (47) | 113 (50) | 167 (45) | 190 (47) | 296 (51) | 84 (52) |
| Hypertension, n (%)                                 | 327 (38) | 126 (40) | 45 (41) | 95 (42)  | 139 (37) | 152 (38) | 239 (41) | 64 (40) |
| Hyperlipidemia, n (%)                               | 253 (29) | 97 (31)  | 23 (21) | 60 (26)  | 96 (26)  | 123 (31) | 168 (29) | 46 (28) |
| Metabolic syndrome, n (%)                           | 13 (1)   | 3 (1)    | 3 (3)   | 7 (3)    | 5 (1)    | 8 (2)    | 7 (1)    | 6 (4)   |
| Diabetes mellitus, n (%)                            | 111 (13) | 50 (16)  | 17 (16) | 38 (17)  | 40 (11)  | 55 (14)  | 92 (16)  | 29 (18) |

|                            |          |         |         |         |         |         |          |         |
|----------------------------|----------|---------|---------|---------|---------|---------|----------|---------|
| Lymphoma/malignancy, n (%) | 40 (5)   | 20 (6)  | 5 (5)   | 9 (4)   | 18 (5)  | 17 (4)  | 34 (6)   | 5 (3)   |
| Crohn's disease, n (%)     | 4 (0)    | 3 (1)   | 0 (0)   | 1 (0)   | 2 (1)   | 3 (1)   | 2 (0)    | 1 (1)   |
| Depression, n (%)          | 161 (18) | 58 (18) | 24 (22) | 48 (21) | 56 (15) | 79 (20) | 120 (20) | 36 (22) |
| Anxiety, n (%)             | 154 (18) | 52 (16) | 25 (23) | 44 (19) | 69 (18) | 75 (19) | 98 (17)  | 33 (20) |

BSA, body surface area; IGA, Investigator's Global Assessment; SD, standard deviation.

History of comorbidities/medical history: cardiovascular disease: combined histories of myocardial infarction, acute coronary syndrome, coronary artery disease, congestive heart failure, peripheral artery disease, cardiac revascularization procedure, ventricular arrhythmia, cardiac arrest, unstable angina, stroke, transient ischemic attack, pulmonary embolism, carotid artery disease, deep vein thrombosis or other cardiovascular event; cardiovascular/diabetes risk factors: hypertension, hyperlipidemia, or metabolic syndrome; lymphoma/malignancy: lymphoma, breast, lung, skin (excluding nonmelanoma skin cancer), or other.

Prior use of biologics: adalimumab, alefacept, certolizumab, efalizumab, etanercept, golimumab, infliximab, ixekizumab, secukinumab, ustekinumab, investigational drugs, and other patient-specified biologics.

Prior use of nonbiologics: acitretin, apremilast, cyclosporine, hydroxyurea, methotrexate, mycophenolate, mofetil, sulfasalazine, tofacitinib, 6-thioguanine, and other patient-specified nonbiologics.



1  
2  
3 The most common comorbidities were hypertension (BSA range: 38%–42%; IGA range: 37%–  
4 41%), hyperlipidemia (BSA range: 21%–31%; IGA range: 26%–31%), depression (BSA range  
5 18%–22%; IGA range 15%–22%), and anxiety (BSA range: 16%–23%; IGA range: 17%–20%;  
6  
7  
8  
9  
10 **Table 1**). Across BSA and IGA groups, at least 60% of patients worked full-time or part-time.  
11  
12 Increasing proportions of patients were disabled as severity increased according to BSA (range:  
13 7%–14%) and IGA (range: 5%–15%; **Table 1**).

### 19 **Patient-Reported Outcomes Descriptive Analysis Results**

20  
21  
22 Fatigue, itching, and pain VAS scores worsened with disease severity as assessed by both BSA  
23 and IGA (**Figures 1A and 1B**). Across BSA categories, mean fatigue scores ranged from 26.5–  
24 40.2, itching was 24.7–55.7, and pain was 15.2–41.7. Among IGA categories, mean fatigue  
25 scores ranged from 21.9–41.8, itching was 12.1–57.3, and pain was 7.4–44.3.  
26  
27  
28  
29  
30  
31 DLQI scores worsened and EQ-VAS health status decreased with increasing disease severity  
32 (**Figures 2A and 2B and Figures 3A and 3B**). Across BSA and IGA categories, mean DLQI  
33 scores ranged from 5.2–10.2 and 4.3–9.7, respectively. Mean EQ-VAS scores ranged from 62.9  
34 (very severe) to 76.4 (mild) across BSA categories and 62.1 (severe) to 78.8 (clear/almost clear)  
35 across IGA categories, with higher scores indicating better health. Work productivity impairment  
36 also increased with greater disease severity (**Figures 4A and 4B**). By BSA category, the “work  
37 hours missed” domain was 2.3%–5.9%, “impairment while working” was 8.4%–19.0%, “work  
38 hours affected” was 9.5%–20.0%, and “daily activities impaired” was 13.1%–31.5%. By IGA  
39 category, the “work hours missed” domain was 1.2%–4.2%, “impairment while working” was  
40 5.5%–19.9%, “work hours affected” was 6.0%–20.9%, and “daily activities impaired” was  
41 8.2%–34.1%.

## Multivariable Linear Regression Model

The multivariable linear regression models confirmed the overall pattern in the descriptive results, demonstrating an association between greater disease severity when assessed by BSA and IGA, and worsening symptoms, worse QoL, and greater work productivity and activity impairment. Worsening itch, pain, and fatigue were significantly associated with increases in BSA and IGA levels:  $P < 0.001$  for moderate, severe, and very severe BSA (reference: mild) and for mild, moderate, and severe IGA (reference: clear/almost clear). Overall DLQI and EQ-VAS scores also worsened with disease severity ( $P < 0.05$  for each level of BSA and IGA) (

### Table 2).

In BSA models, the moderate, severe, and very severe psoriasis categories were significantly associated with poorer outcomes in the WPAI domains of “impairment while working” and “daily activities impaired” compared with mild severity (all  $P < 0.05$ ) (Table 2). Very severe disease was significantly associated with increased “work hours missed” ( $P < 0.05$ ), and moderate and very severe disease were associated with increased “work hours affected” (both  $P < 0.05$ ) compared with mild disease.

**Table 2. Linear regression results by BSA severity**

|                                       | BSA Severity Groups<br>(reference = mild: 0–5%) |                |           | IGA Severity Groups<br>(reference = clear/almost clear: 0/1) |                |           |
|---------------------------------------|-------------------------------------------------|----------------|-----------|--------------------------------------------------------------|----------------|-----------|
|                                       | Moderate:<br>>5–10%                             | Moderate:<br>3 | Severe: 4 | Mild: 2                                                      | Moderate:<br>3 | Severe: 4 |
| Parameter,<br>coefficient (95%<br>CI) |                                                 |                |           |                                                              |                |           |
| Symptoms                              |                                                 |                |           |                                                              |                |           |

|                               |                              |                               |                                |                               |                                |                                  |
|-------------------------------|------------------------------|-------------------------------|--------------------------------|-------------------------------|--------------------------------|----------------------------------|
| Fatigue                       | 9.50<br>(5.87, 13.14)*       | 13.13<br>(7.49,<br>18.76)*    | 12.67<br>(8.52,<br>16.82)*     | 7.52 (3.55,<br>11.49)*        | 12.45 (8.79,<br>16.11)*        | 19.69<br>(14.48,<br>24.91)*      |
| Itch                          | 23.17<br>(19.27,<br>27.06)*  | 25.42<br>(19.40,<br>31.44)*   | 32.10<br>(27.66,<br>36.54)*    | 18.27<br>(14.21,<br>22.33)*   | 37.15<br>(33.41,<br>40.90)*    | 45.70<br>(40.36,<br>51.04)*      |
| Pain                          | 15.09<br>(11.46,<br>18.71)*  | 19.37<br>(13.76,<br>24.97)*   | 27.68<br>(23.55,<br>31.82)*    | 10.36 (6.48,<br>14.24)*       | 25.15<br>(21.57,<br>28.72)*    | 37.37<br>(32.27,<br>42.47)*      |
| <b>DLQI</b>                   | 1.91<br>(1.17, 2.66)*        | 3.40<br>(2.25,<br>4.56)*      | 5.26<br>(4.41,<br>6.11)*       | 0.85 (0.04,<br>1.67)*         | 3.76 (3.01,<br>4.52)*          | 5.47 (4.40,<br>6.55)*            |
| <b>EQ-VAS</b>                 | -5.14<br>(-7.91, -<br>2.36)* | -7.34<br>(-11.64, -<br>3.04)* | -12.98<br>(-16.14, -<br>9.81)* | -3.47 (-<br>6.51, -<br>0.43)* | -7.35 (-<br>10.16, -<br>4.55)* | -15.15 (-<br>19.15, -<br>11.55)* |
| <b>WPAI<br/>questionnaire</b> |                              |                               |                                |                               |                                |                                  |
| Work time<br>missed           | 0.58<br>(-1.38, 2.55)        | -0.71<br>(-3.68,<br>2.26)*    | 3.50<br>(1.17,<br>5.82)*       | 1.13 (-1.01,<br>3.27)         | 2.96 (1.01,<br>4.92)*          | 2.87 (0.01,<br>5.73)*            |
| Impairment<br>while working   | 8.00<br>(4.58, 11.39)*       | 5.22<br>(0.06,<br>10.39)*     | 11.52<br>(7.49,<br>15.55)*     | 2.87 (-0.78,<br>6.53)         | 11.56 (8.22,<br>14.91)*        | 15.14<br>(10.29,<br>20.00)*      |

|                              |                         |                            |                             |                        |                             |                             |
|------------------------------|-------------------------|----------------------------|-----------------------------|------------------------|-----------------------------|-----------------------------|
| Working hours<br>affected    | 8.79<br>(5.20, 12.37)*  | 5.17<br>(-0.27,<br>10.61)  | 11.44<br>(7.19,<br>15.70)*  | 3.49 (-0.35,<br>7.33)* | 13.05 (9.54,<br>16.55)*     | 15.65<br>(10.54,<br>20.77)* |
| Daily activities<br>affected | 10.28<br>(7.01, 13.54)* | 11.54<br>(6.50,<br>16.59)* | 19.69<br>(15.97,<br>23.40)* | 7.88 (4.34,<br>11.42)* | 15.04<br>(11.78,<br>18.31)* | 26.36<br>(21.70,<br>31.01)* |

\*Significant at  $P < 0.05$ .

BSA, body surface area; CI, confidence interval; DLQI, Dermatology Life Quality Index; EQ-VAS, EuroQoL visual analog scale; IGA, Investigator's Global Assessment, WPAI, Work Productivity and Activity Impairment.

Fatigue, itch, and pain symptom scale: 0–100; DLQI scale: 0–30; EQ-VAS scale: 0–100; WPAI scale: 0–10.

All models adjusted a priori for age, gender, psoriasis duration, and body mass index at registry enrollment.

1  
2  
3  
4  
5 In IGA models, mild, moderate, and severe psoriasis categories were significantly associated  
6 with worse outcomes for the WPAI domain of “daily activities impaired” compared with  
7 clear/almost clear (all  $P < 0.05$ ). Compared with the mild psoriasis category, moderate and  
8 severe psoriasis categories were significantly associated with poorer outcomes in the domains of  
9 “work hours missed,” “impairment while working,” and “work hours affected” (all  $P < 0.05$ ).  
10  
11  
12  
13  
14  
15  
16  
17  
18

### 19 Sensitivity Analysis

20 Ordinal regression modeling was performed as a sensitivity analysis to confirm the results of the  
21 linear regression; results confirmed a consistent trend, with increasing severity of disease  
22 associated with worsening QoL and greater impairment in work productivity and activity.  
23  
24  
25  
26  
27

28 Results of the proportional odds models for BSA and IGA disease severity categories are shown  
29 in **Supplementary Table 1**.  
30  
31  
32  
33  
34  
35  
36  
37  
38  
39  
40  
41  
42  
43  
44  
45  
46  
47  
48  
49  
50  
51  
52  
53  
54  
55  
56  
57  
58  
59  
60

## DISCUSSION

In this cross-sectional analysis of the Corrona Psoriasis Registry, multivariable linear regression models showed patient-reported symptoms, QoL, and work productivity worsened with increasing disease severity, as measured by BSA and IGA. The results were statistically significant across all levels of psoriasis severity for patient-reported pain, itch, and fatigue; DLQI overall scores; EQ-VAS; and the “daily activities impaired” domain of the WPAI questionnaire. For the WPAI domains “work hours missed,” “impairment while working,” and “work hours affected” outcomes were significantly worse for patients with the highest severity of psoriasis (BSA = very severe, IGA = severe). Findings were overall consistent between the BSA and IGA results.

To the authors’ knowledge, the present study was the first to explore the link between IGA and PROs in a real-world setting. Physician’s Global Assessment has been used previously in real-world settings in both postmarketing safety studies<sup>15,16</sup> and patient registries.<sup>16-19</sup> A multicenter, prospective study conducted in Spain found psoriasis severity was the primary factor affecting QoL. Although PGA data were collected in that study, PASI was ultimately used for the multivariate modeling.<sup>20</sup>

Of note, the BSA and IGA categories as defined in the present study differ somewhat from those used in prior research. The present study used the 5-point mod 2011 scale, which differs from the 6-point scales used in some clinical trials of biologic treatments for psoriasis<sup>9</sup> in that the “almost clear” category is more narrowly defined compared with the “minimal” category in PGA and the other IGA versions.<sup>9</sup> The category cutoff points for BSA used in the present study (ie, mild: 0%–5%, moderate: >5%–10%, severe: >10%–15%, and very severe: >15%) also differed from those that have been used in certain studies and referred to in guidelines and expert consensus

1  
2  
3 statements (eg, mild 0%–<3%, moderate 3%–<10%, and severe  $\geq 10\%$ ;<sup>5</sup> moderate to severe  
4  
5 >10%<sup>21</sup>, no/little <1%, mild 1%–2%, severe  $\geq 3\%$  <sup>8</sup>). The addition of the “very severe” category  
6  
7  
8 in the present study may shed light on specific unmet medical needs in this segment of the  
9  
10 population with psoriasis. Further research is required to fully understand how differences in  
11  
12 BSA categorization may impact results across clinical trials and observational studies.

13  
14  
15 In a prior study by Korman *et al* of psoriasis severity and PROs, severity of symptoms, EQ-5D,  
16  
17 DLQI, and WPAI domains were assessed using BSA category (mild, moderate, or severe as  
18  
19 determined by a physician).<sup>4</sup> Although the categorization of psoriasis severity differed, the  
20  
21 results are generally consistent with the findings of the present study, for which severity of  
22  
23 fatigue, itching, and pain; DLQI total scores; and WPAI domains worsened with increasing  
24  
25 disease severity.<sup>4</sup> In addition, lower EQ-5D summary scores were reported with increasing  
26  
27 disease severity,<sup>4</sup> similar to the lower EQ-VAS scores observed in the present study.

28  
29  
30  
31 Although the present study demonstrates the association between increased psoriasis severity and  
32  
33 worsened PROs, future research may clarify this relationship. The present analysis did not  
34  
35 address the potential for the outcomes of interest to be highly correlated with one another. For  
36  
37 instance, previous research by Lewis-Beck *et al.* found an inverse relationship between itching,  
38  
39 pain, and scaling severity and work productivity.<sup>22</sup> Further research may investigate how QoL  
40  
41 and work productivity measures may interact with one another in the context of psoriasis  
42  
43 severity. In addition, due to the cross-sectional study design, the results represent psoriasis  
44  
45 severity and PROs at one timepoint. Future research using longitudinal data could show how  
46  
47 changes in psoriasis severity may relate to changes over time in QoL and work productivity. In  
48  
49 addition, particularly for a longitudinal study, the combination and interaction of BSA and IGA  
50  
51 as a single measure of severity could prove informative.  
52  
53  
54  
55  
56  
57  
58  
59  
60

1  
2  
3 The results of this study must be interpreted in the context of the source of the data, study design,  
4 and analysis methods. First, this study was a cross-sectional analysis, which does not allow for  
5 causal inferences regarding psoriasis severity and the outcomes of interest. Second, the patients  
6 enrolled in the registry were recruited from specific dermatology practices, which may have been  
7 more focused on psoriasis therapy and, therefore, may not be representative of the general US  
8 psoriasis population. The linear regression model was robust to the non-normal distribution of  
9 the data; however, estimates at the extreme lower and upper levels of severity may have been  
10 over- or underestimated.  
11  
12  
13  
14  
15  
16  
17  
18  
19  
20  
21  
22  
23

## 24 **CONCLUSIONS**

25  
26 Increased psoriasis severity as measured by both BSA and IGA categories was associated with  
27 worsened PROs in this US-based psoriasis registry study. Future research is warranted to  
28 understand the potential interrelationships between PROs and to understand whether longitudinal  
29 improvements in psoriasis severity are associated with improvements in PROs.  
30  
31  
32  
33  
34  
35  
36  
37  
38  
39  
40  
41  
42  
43  
44  
45  
46  
47  
48  
49  
50  
51  
52  
53  
54  
55  
56  
57  
58  
59  
60



## FOOTNOTES

**Contributors:** BS interpreted the results, critically reviewed the manuscript, and agreed to be accountable for all aspects of the manuscript. JDG helped design the study, acquired the data, critically reviewed the manuscript, and agreed to be accountable for all aspects of the manuscript. CK helped design the study, interpreted the results, and critically reviewed the manuscript. MM helped design the study, collected the data, undertook the data analysis, interpreted the results, and critically reviewed the manuscript. NG undertook the data analysis, interpreted the results, and critically reviewed the manuscript. PH helped design the study, interpreted the results, and critically reviewed the manuscript. YZ helped design the study, interpreted the results, and critically reviewed the manuscript. VH interpreted the results and critically reviewed the manuscript. FL helped design the study, interpreted the results, and critically reviewed the manuscript. ML helped design the study, acquired the data, and critically reviewed the manuscript.

**Funding:** This study was sponsored by Corrona, LLC and the analysis was funded by Novartis. Access to study data was limited to Corrona and Corrona statisticians completed all of the analysis; all authors contributed to the interpretation of the results. Corrona has been supported through contracted subscriptions in the last 2 years by AbbVie, Amgen, Boehringer Ingelheim, Bristol-Myers Squibb, Celgene, Crescendo, Eli Lilly and Company, Genentech, Gilead, GSK, Janssen, Momenta Pharmaceuticals, Novartis, Pfizer Inc., Regeneron, Roche, Merck, UCB, and Valeant.

Parts of this manuscript were presented as a poster March 3–7, 2017 at 75th Annual Meeting of the American Academy of Dermatology in Orlando, Florida, USA.

**Competing interests:** BS has served as a consultant for AbbVie, Almirall, Amgen, AstraZeneca, Boehringer Ingelheim, Celgene, Dermira, Galderma, GlaxoSmithKline, Eli Lilly, Janssen, LEO

1  
2  
3 Pharma, Medac, Meiji Seika Pharma, Menlo Therapeutics, Novartis, Ortho  
4  
5 Dermatologics/Valeant, Pfizer, Regeneron, Sanofi-Genzyme, Sun Pharma, UCB Pharma; as Co-  
6  
7 scientific Director of the Corrona Psoriasis Registry; and has received grant support for the  
8  
9 University of Connecticut fellowship program from AbbVie and Janssen. ML is an employee of  
10  
11 Mount Sinai and receives research funds from: Abbvie, Boehringer Ingelheim, Celgene, Eli  
12  
13 Lilly, Incyte, Janssen/Johnson & Johnson, Leo Pharmaceuticals, Medimmune/Astra Zeneca,  
14  
15 Novartis, Pfizer, Sciderm, Valeant, and ViDac. ML is also a consultant for Allergan, Aqua,  
16  
17 Boehringer Ingelheim, Corrona, LEO Pharma, Menlo, and Promius. JDG is an employee and  
18  
19 shareholder of Corrona, LLC, and has been a consultant to Genentech, Janssen, Novartis, Pfizer,  
20  
21 and Eli Lilly. MM is an employee of Corrona, LLC, and at the time of the study, was a member  
22  
23 of the University of Delaware, Dept. of Behavioral Health and Nutrition Affiliate Faculty (non-  
24  
25 remunerative position). NG is an employee of Corrona, LLC, and CK was an employee of  
26  
27 Corrona, LLC, at the time of the study. VH and PH are employees of Novartis, and YZ and FL  
28  
29 were employees of Novartis at the time of the study.  
30  
31  
32  
33  
34

35 **Patient consent:** All patients were required to provide written, informed consent prior to  
36  
37 participating.  
38  
39

40 **Ethics approval:** All participating investigators were required to obtain full board approval for  
41  
42 research involving human subjects through a central institutional review board (IntegReview).  
43  
44 For academic investigative sites that did not receive a waiver to use the central IRB, full board  
45  
46 approval was obtained for the respective governing IRB, and documentation of approval was  
47  
48 submitted to the sponsor prior to initiating any study procedures.  
49  
50

51 **Data sharing statement:** No additional data are available.  
52  
53

#### 54 **Acknowledgments**

55  
56  
57  
58  
59  
60

1  
2  
3 Access to study data was limited to Corrona, and Corrona statisticians completed all of the  
4  
5 analysis; all authors contributed to the interpretation of the results. Corrona has been supported  
6  
7 through contracted subscriptions in the last 2 years by AbbVie, Amgen, Boehringer Ingelheim,  
8  
9 Bristol-Myers Squibb, Celgene, Crescendo, Eli Lilly and Company, Genentech, Gilead, GSK,  
10  
11 Janssen, Merck, Momenta Pharmaceuticals, Novartis, Pfizer, Regeneron, Roche, UCB, and  
12  
13 Valeant. Novartis participated in the interpretation of data, review, and approval of the  
14  
15 manuscript.  
16  
17

18  
19 The authors take full responsibility for the content of the paper. They thank Jacob Willet, Karen  
20  
21 Kurtyka, and Lisa Kaspin-Powell (Oxford PharmaGenesis Inc, Newtown, PA, USA) for medical  
22  
23 writing support, editorial assistance, and collation and incorporation of comments from all  
24  
25 authors. These services were funded by Novartis Pharmaceutical Corporation, East Hanover, NJ,  
26  
27 USA. The authors also thank all patients who participated in this study.  
28  
29  
30  
31  
32  
33  
34  
35  
36  
37  
38  
39  
40  
41  
42  
43  
44  
45  
46  
47  
48  
49  
50  
51  
52  
53  
54  
55  
56  
57  
58  
59  
60

**REFERENCES**

- 1 Rachakonda TD, Schupp CW, Armstrong AW. Psoriasis prevalence among adults in the United States. *J Am Acad Dermatol* 2014;**70**:512–6.
- 2 Bhosle MJ, Kulkarni A, Feldman SR, et al. Quality of life in patients with psoriasis. *Health Qual Life Outcomes* 2006;**4**:35.
- 3 Gelfand JM, Feldman SR, Stern RS, et al. Determinants of quality of life in patients with psoriasis: A study from the US population. *J Am Acad Dermatol* 2004;**51**:704–8.
- 4 Korman NJ, Zhao Y, Pike J, et al. Relationship between psoriasis severity, clinical symptoms, quality of life and work productivity among patients in the USA. *Clin Exp Dermatol* 2016;**41**:514–21.
- 5 Armstrong AW, Schupp C, Wu J, et al. Quality of life and work productivity impairment among psoriasis patients: findings from the National Psoriasis Foundation survey data 2003-2011. *PLoS One* 2012;**7**:e52935.
- 6 Menter A, Gottlieb A, Feldman SR, et al. Guidelines of care for the management of psoriasis and psoriatic arthritis: Section 1. Overview of psoriasis and guidelines of care for the treatment of psoriasis with biologics. *J Am Acad Dermatol* 2008;**58**:826–850.
- 7 Armstrong AW, Siegel MP, Bagel J, et al. From the Medical Board of the National Psoriasis Foundation: Treatment targets for plaque psoriasis. *J Am Acad Dermatol* 2017;**76**:290–8.
- 8 Helmick CG, Lee-Han H, Hirsch SC, et al. Prevalence of psoriasis among adults in the U.S.: 2003-2006 and 2009-2010 National Health and Nutrition Examination Surveys. *Am J Prev Med* 2014;**47**:37–45.
- 9 Langley RG, Feldman SR, Nyirady J, et al. The 5-point Investigator's Global Assessment (IGA) Scale: a modified tool for evaluating plaque psoriasis severity in clinical trials. *J Dermatolog Treat* 2015;**26**:23–31.

- 1  
2  
3 10 Feldman SR, Krueger GG. Psoriasis assessment tools in clinical trials. *Ann Rheum Dis* 2005;  
4  
5 **64 Suppl 2**:ii65–8;discussion ii69–73.  
6  
7  
8 11 Duffin KC, Papp KA, Bagel J, et al. Evaluation of the Physician Global Assessment and  
9  
10 Body Surface Area Composite Tool for assessing psoriasis response to apremilast therapy:  
11  
12 results from ESTEEM 1 and ESTEEM 2. *J Drugs Dermatol* 2017;**16**:147–53.  
13  
14  
15 12 Finlay AY, Khan GK. Dermatology Life Quality Index (DLQI)—a simple practical measure  
16  
17 for routine clinical use. *Clin Exp Dermatol* 1994;**19**:210–6.  
18  
19  
20 13 EuroQol Group. EuroQol—a new facility for the measurement of health-related quality of  
21  
22 life. *Health Policy* 1990;**16**:199–208.  
23  
24  
25 14 Reilly MC, Zbrozek AS, Dukes EM. The validity and reproducibility of a work productivity  
26  
27 and activity impairment instrument. *Pharmacoeconomics* 1993;**4**:353–65.  
28  
29  
30 15 Kimball AB, Pariser D, Yamauchi PS, et al. OBSERVE-5 interim analysis: An observational  
31  
32 postmarketing safety registry of etanercept for the treatment of psoriasis. *J Am Acad Dermatol*  
33  
34 2013;**68**:756–64.  
35  
36  
37 16 Menter A, Thaci D, Papp KA, et al. Five-year analysis from the ESPRIT 10-year  
38  
39 postmarketing surveillance registry of adalimumab treatment for moderate to severe psoriasis. *J*  
40  
41 *Am Acad Dermatol* 2015;**73**:410–9,e416.  
42  
43  
44 17 Strober BE, Bissonnette R, Fiorentino D, et al. Comparative effectiveness of biologic agents  
45  
46 for the treatment of psoriasis in a real-world setting: results from a large, prospective,  
47  
48 observational study (Psoriasis Longitudinal Assessment and Registry [PSOLAR]). *J Am Acad*  
49  
50 *Dermatol* 2016;**74**:851-861,e854.  
51  
52  
53 18 Huynh DH, Boyd TA, Etzel CJ, et al. Persistence of low disease activity after tumour  
54  
55 necrosis factor inhibitor (TNFi) discontinuation in patients with psoriatic arthritis. *RMD Open*  
56  
57 2017;**3**:e000395.  
58  
59  
60

- 1  
2  
3 19 Lindstrom Egholm C, Krogh NS, Pincus T, *et al.* Discordance of global assessments by  
4 patient and physician is higher in female than in male patients regardless of the physician's sex:  
5 data on patients with rheumatoid arthritis, axial spondyloarthritis, and psoriatic arthritis from the  
6 DANBIO registry. *J Rheumatol* 2015;**42**:1781–5.  
7  
8  
9  
10  
11 20 Daudén E, Pujol RM, Sanchez-Carazo JL, *et al.* Demographic characteristics and health-  
12 related quality of life of patients with moderate-to-severe psoriasis: the VACAP study. *Actas*  
13 *Dermosifiliogr* 2013;**104**:807–14.  
14  
15  
16  
17 21 Mrowietz U, Kragballe K, Reich K, *et al.* Definition of treatment goals for moderate to  
18 severe psoriasis: a European consensus. *Arch Dermatol Res* 2011;**303**:1–10.  
19  
20  
21  
22 22 Lewis-Beck C, Abouzaid S, Xie L, *et al.* Analysis of the relationship between psoriasis  
23 symptom severity and quality of life, work productivity, and activity impairment among patients  
24 with moderate-to-severe psoriasis using structural equation modeling. *Patient Prefer Adherence*  
25 2013;**7**:199–205.  
26  
27  
28  
29  
30  
31  
32  
33  
34  
35  
36  
37  
38  
39  
40  
41  
42  
43  
44  
45  
46  
47  
48  
49  
50  
51  
52  
53  
54  
55  
56  
57  
58  
59  
60

## FIGURES

### **Figure 1A and 1B. Patient-reported Symptoms by BSA Severity Group (A) and IGA Severity Group (B)**

Fatigue, itch, and pain symptom scale: 0–100.

BSA, Body surface area; IGA, Investigator's Global Assessment; VAS, visual analogue scale.

### **Figure 2A and 2B. DLQI Scores by BSA Severity Group (A) and IGA Severity Group (B)**

DLQI scale: 0–30.

DLQI, Dermatology Life Quality Index; BSA, body surface area; IGA, Investigator's Global Assessment.

### **Figure 3A and 3B. EQ-VAS by BSA Severity Group (A) and IGA Severity Group (B)**

EQ-VAS scale: 0–100.

EQ-VAS, EuroQoL visual analog scale; BSA, body surface area; IGA, Investigator's Global Assessment; VAS, visual analog scale.

### **Figure 4A and 4B. WPAI Domains by BSA Severity Group (A) and IGA Severity Group (B)**

WPAI, Work Productivity and Activity Impairment; BSA, body surface area; IGA, Investigator's Global Assessment.

(a)

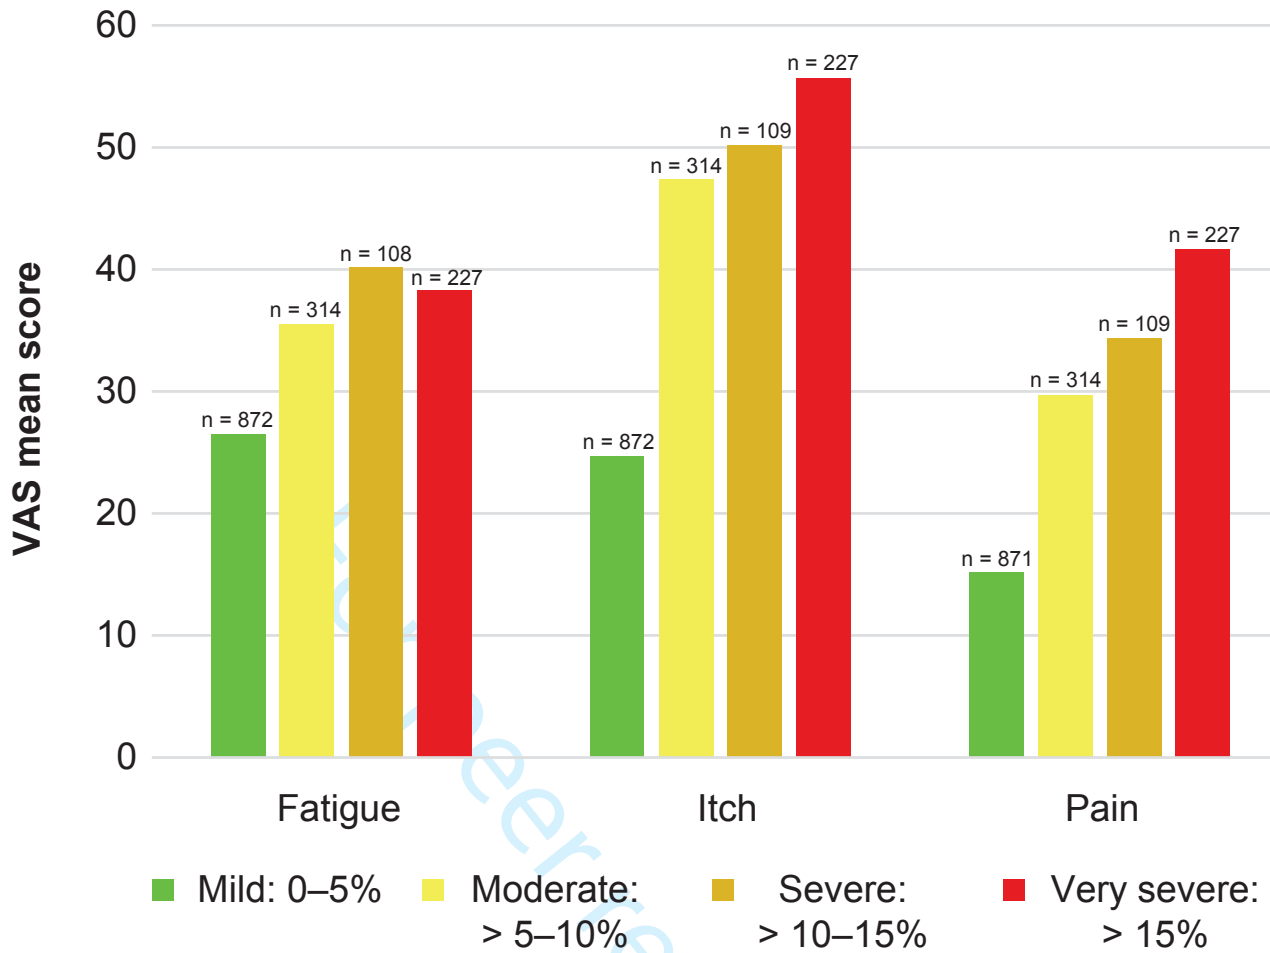

(b)

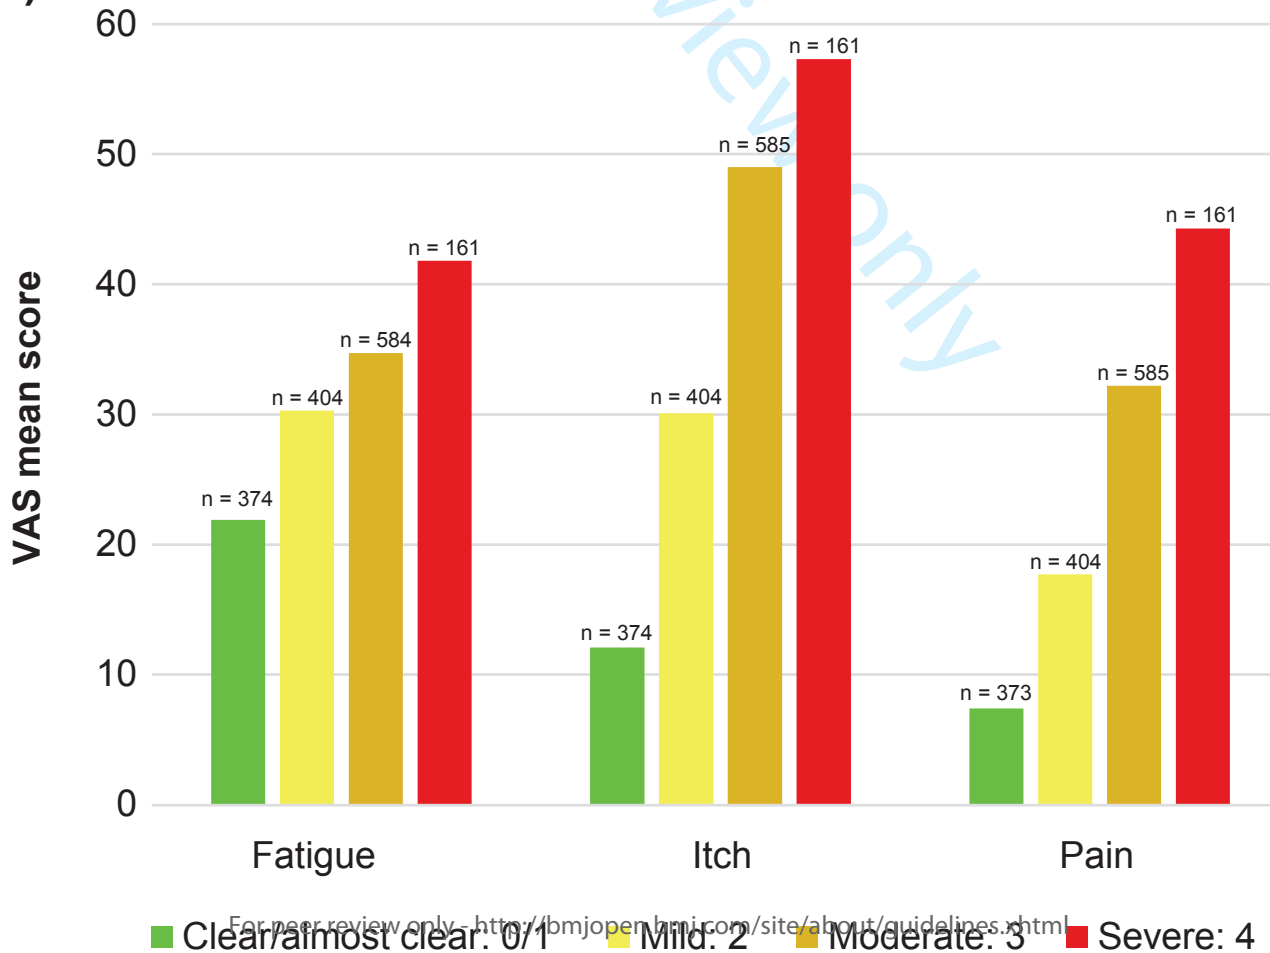

For peer review only - <http://bmjopen.bmj.com/site/about/guidelines.xhtml>



(a)

1  
2  
3  
4  
5  
6  
7  
8  
9  
10  
11  
12  
13  
14  
15  
16  
17  
18  
19  
20  
21  
22  
23  
24  
25  
26  
27  
28  
29  
30  
31  
32  
33  
34  
35  
36  
37  
38  
39  
40  
41  
42  
43  
44  
45  
46  
47  
48  
49  
50  
51  
52  
53  
54  
55  
56  
57  
58  
59  
60

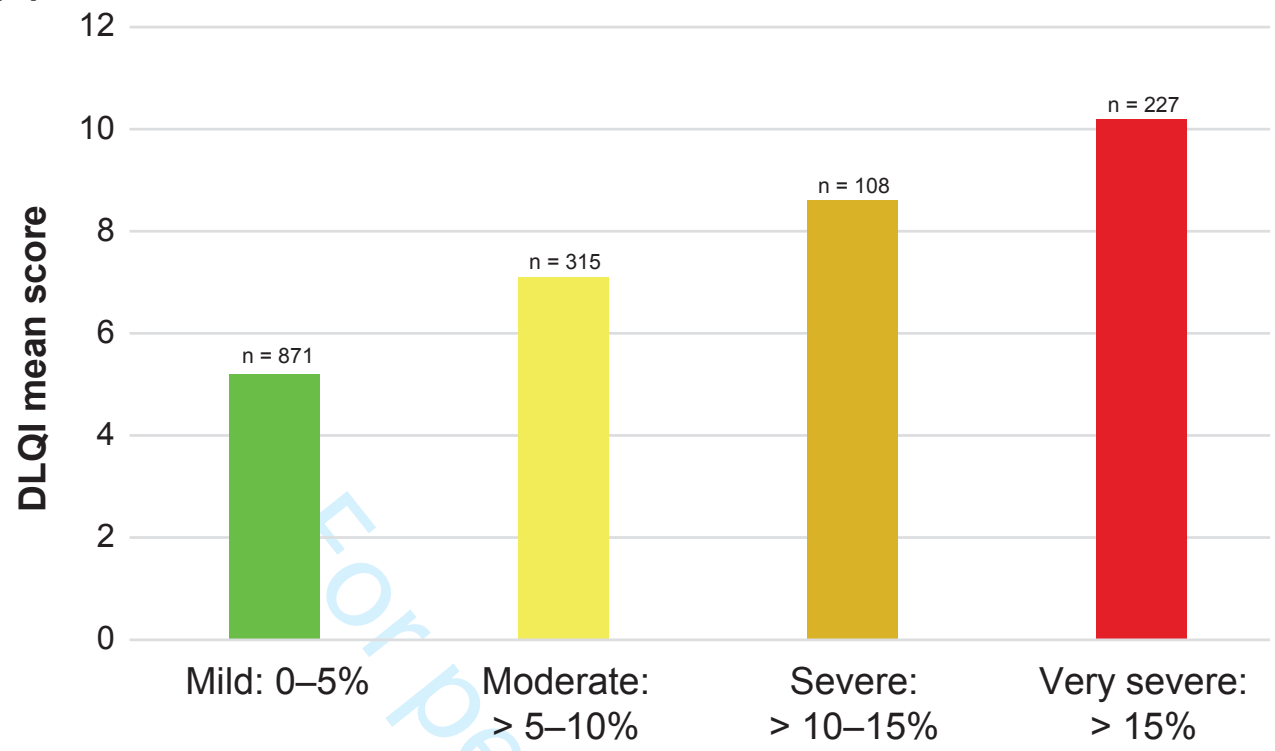

(b)

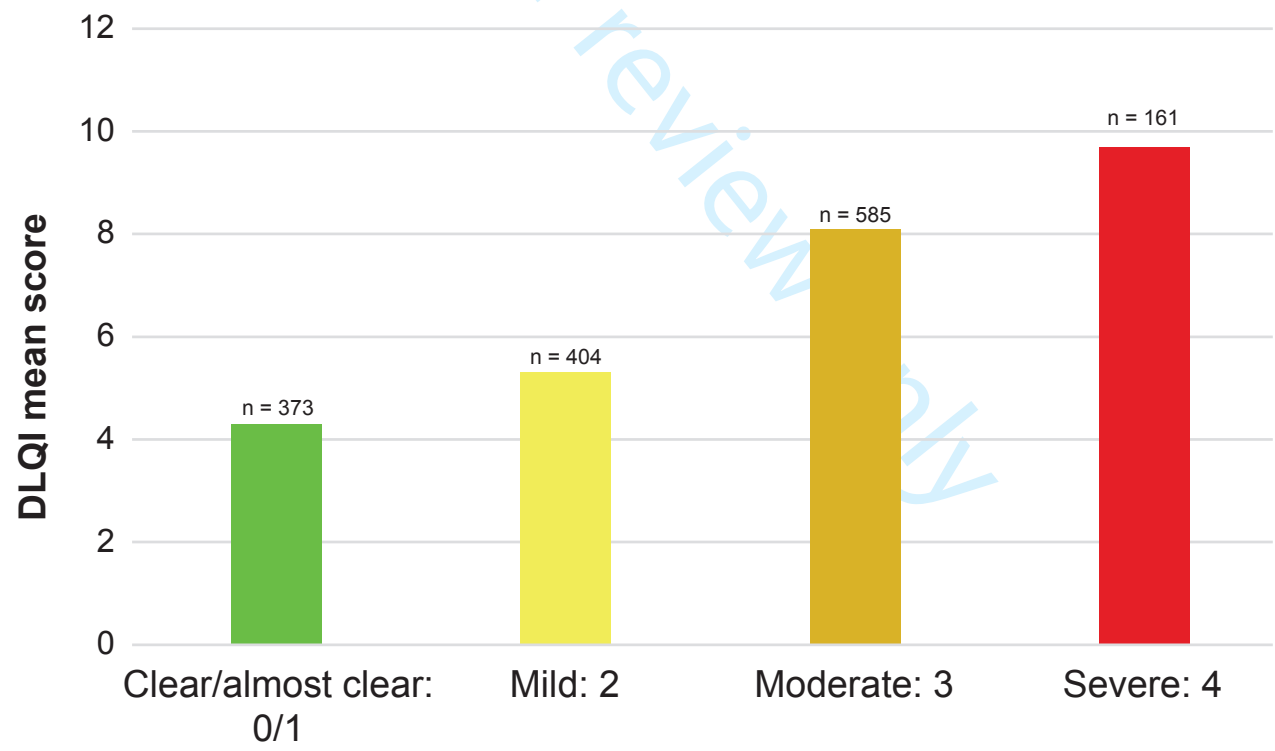

(a)

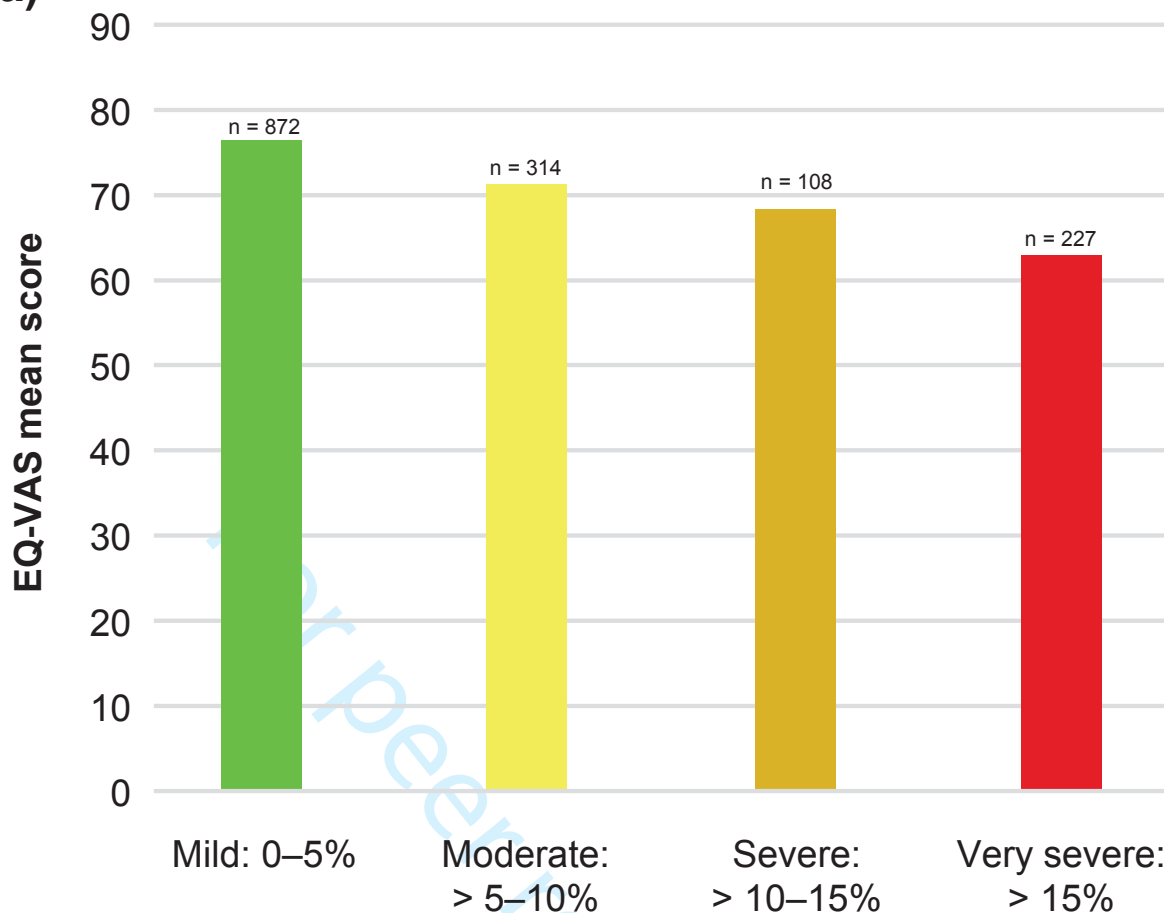

(b)

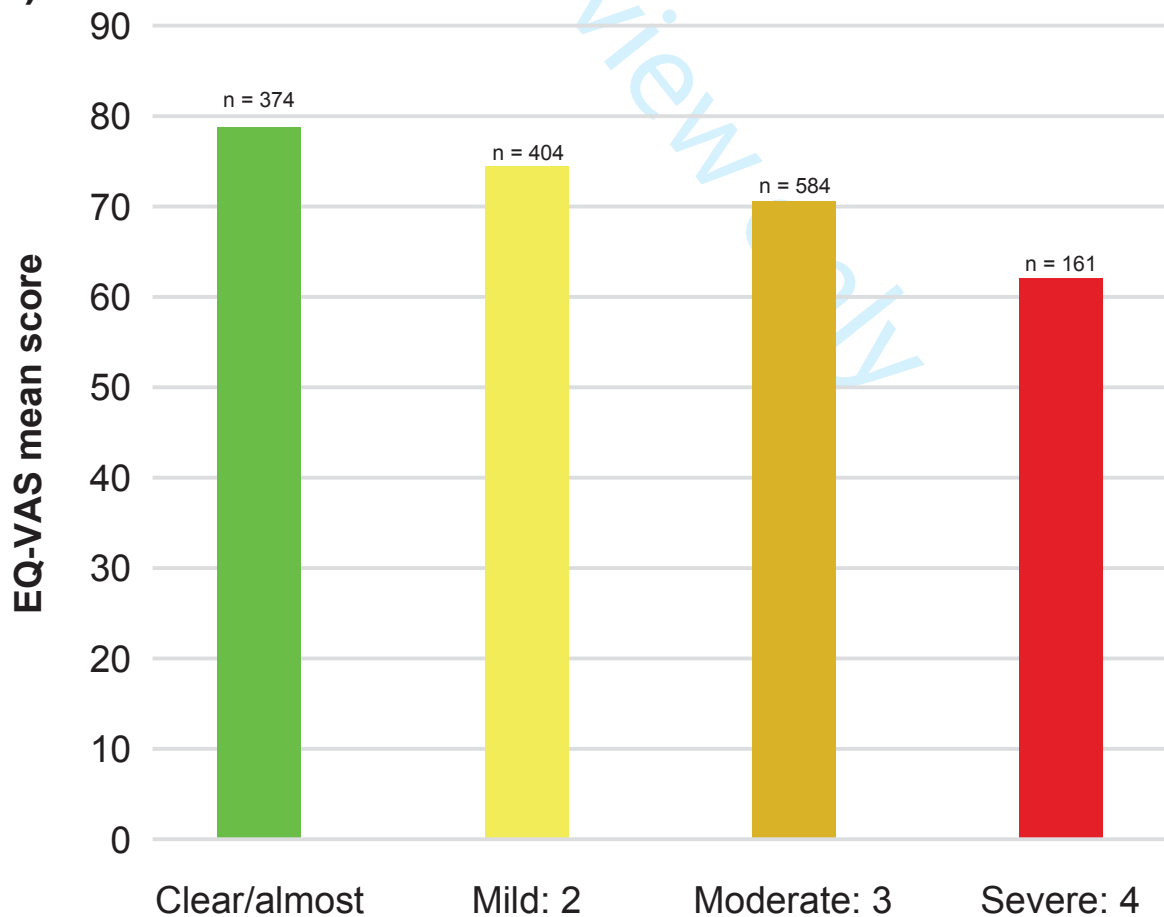

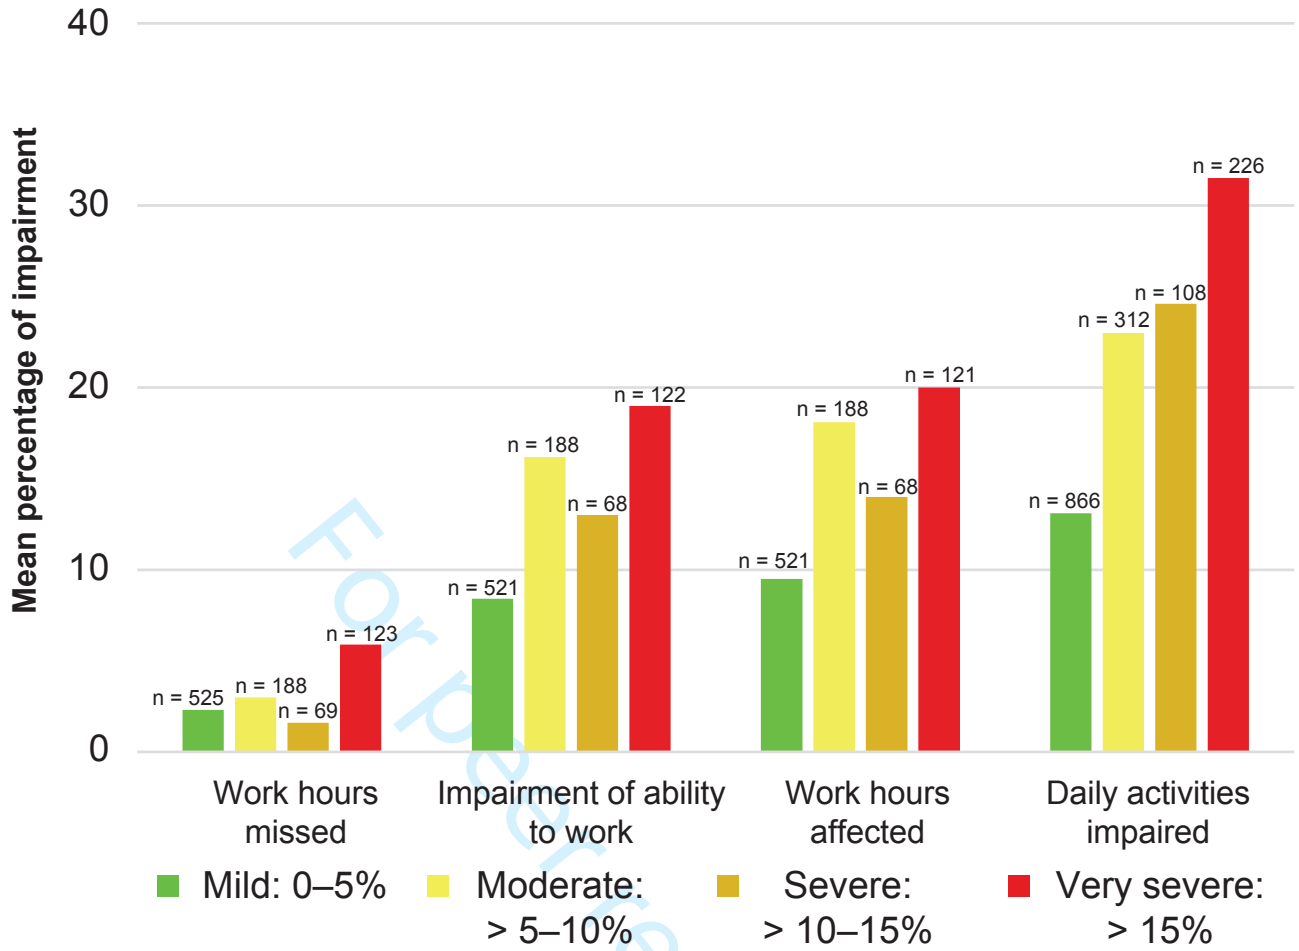

(b)

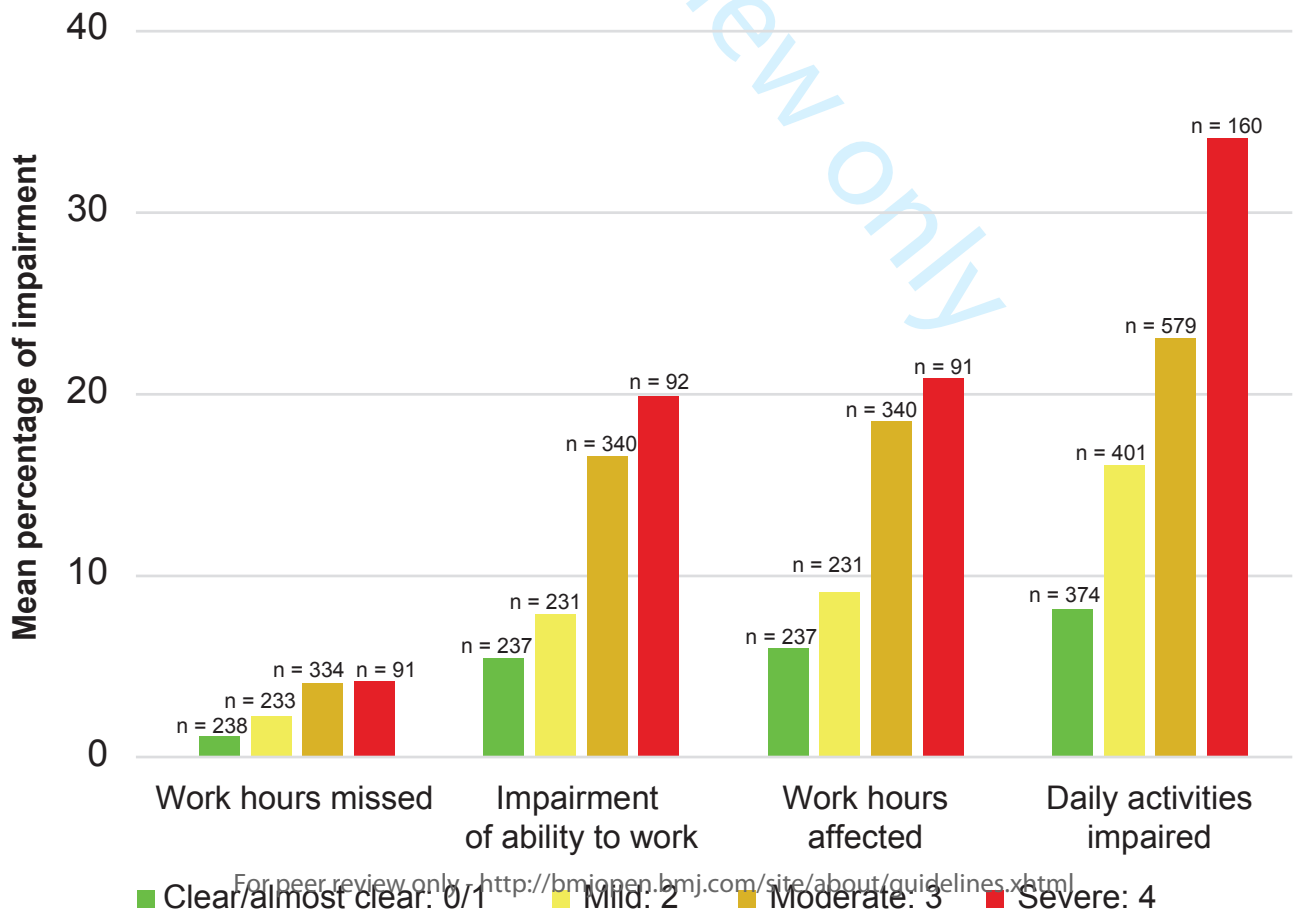

**Supplementary Table 1. Proportional odds model results for specific PROs by BSA and IGA severity covariates**

|                                                          | Severity measured by BSA | Severity measured by IGA |
|----------------------------------------------------------|--------------------------|--------------------------|
| <b>Odds Ratio (95% CI)</b>                               |                          |                          |
| <b>Symptoms</b>                                          |                          |                          |
| <b>Fatigue</b>                                           |                          |                          |
| None vs (Mild, Moderate, Severe, Very Severe)            | 1.01 (1.00, 1.02)        | 1.19 (1.07, 1.33)        |
| (None, Mild) vs (Moderate, Severe, Very Severe)          | 1.02 (1.01, 1.03)        | 1.44 (1.31, 1.58)        |
| (None, Mild, Moderate) vs (Severe, Very Severe)          | 1.03 (1.02, 1.04)        | 1.46 (1.33, 1.61)        |
| (None, Mild, Moderate, Severe) vs Very Severe            | 1.02 (1.02, 1.03)        | 1.43 (1.27, 1.61)        |
| <b>Itch</b>                                              |                          |                          |
| None vs (Mild, Moderate, Severe, Very Severe)            | 1.10 (1.07, 1.13)        | 2.69 (2.45, 2.95)*       |
| (None, Mild) vs (Moderate, Severe, Very Severe)          | 1.09 (1.07, 1.11)        |                          |
| (None, Mild, Moderate) vs (Severe, Very Severe)          | 1.06 (1.04, 1.07)        |                          |
| (None, Mild, Moderate, Severe) vs Very Severe            | 1.05 (1.04, 1.06)        |                          |
| <b>Pain</b>                                              |                          |                          |
| None vs (Mild, Moderate, Severe, Very Severe)            | 1.06 (1.04, 1.07)        | 1.89 (1.71, 2.10)        |
| (None, Mild) vs (Moderate, Severe, Very Severe)          | 1.06 (1.05, 1.08)        | 2.21 (1.99, 2.46)        |
| (None, Mild, Moderate) vs (Severe, Very Severe)          | 1.06 (1.05, 1.07)        | 2.44 (2.15, 2.77)        |
| (None, Mild, Moderate, Severe) vs Very Severe            | 1.04 (1.03, 1.05)        | 2.48 (2.11, 2.91)        |
| <b>DLQI</b>                                              |                          |                          |
| None vs (Small, Moderate, Very Large, Extremely Large)   | 1.09 (1.07, 1.12)        | 2.24 (1.99, 2.52)        |
| (None, Small) vs (Moderate, Very Large, Extremely Large) | 1.06 (1.05, 1.08)        | 1.85 (1.66, 2.06)        |
| (None, Small, Moderate) vs (Very Large, Extremely Large) | 1.04 (1.03, 1.05)        | 1.57 (1.40, 1.77)        |
| (None, Small, Moderate, Very Large) vs Extremely Large   | 1.03 (1.01, 1.04)        | 1.27 (1.01, 1.59)        |
| <b>EQ-VAS</b>                                            | 0.97 (0.97, 0.98)*       | 0.71 (0.66, 1.78)*       |
| <b>WPAI questionnaire</b>                                |                          |                          |
| Work time missed <sup>†</sup>                            | 1.02 (1.00, 1.03)        | 1.45 (1.21, 1.75)        |
| Impairment while working <sup>†</sup>                    | 1.03 (1.02, 1.04)        | 1.51 (1.34, 1.71)        |
| Working hours affected <sup>†</sup>                      | 1.03 (1.02, 1.04)        | 1.51 (1.33, 1.70)        |
| Daily activities affected                                |                          |                          |
| None vs (A Little, A Lot)                                | 1.04 (1.03, 1.04)*       | 1.55 (1.41, 1.70)        |
| (None, A Little) vs A Lot                                |                          | 1.95 (1.68, 2.25)        |

\*Proportional odds assumption was not violated.

<sup>†</sup>Logistic regression model.

Fatigue outcome levels (0–100 VAS): 0 = None (0), 1 = Mild (>0 to ≤12), 2 = Moderate (>12 to ≤32), Severe = (>32 to ≤59), Very Severe (>59 to ≤100).

Itch outcome levels (0–100 VAS): 0 = None (0), 1 = Mild (>0 to ≤9), 2 = Moderate (>9 to ≤34), 3 = Severe (>34 to ≤69), Very Severe (>69 to ≤100).

Pain outcome levels (0–100 VAS): 0 = None (0), 1 = Mild (>0 to ≤7), 2 = Moderate (>7 to ≤24), 3 = Severe (>24 to ≤59), Very Severe (>59 to ≤100).

DLQI outcome levels: 0 = None, 1 = Small, 2 = Moderate, 3 = Very Large, 4 = Extremely Large.

EQ-VAS outcome levels: 0 = Poor Health (≥0 to ≤20), 1 = Fair Health (<20 to ≤40), 2 = Good Health (<40 to ≤60), 3 = Very Good Health (<60 to ≤80), 4 = Excellent Health (>80 to ≤100).

WPAI outcome levels for work time missed due to psoriasis, impairment while working due to psoriasis, and working hours affected by psoriasis: 0 = None, 1 = Some (>0 to ≤100).

WPAI outcome levels for daily activities affected by psoriasis: 0 = None (0), 1 = A Little (>0 to <50), 2 = A Lot (≥50 to ≤100).

BSA, body surface area; CI, confidence interval; DLQI, Dermatology Life Quality Index; EQ-VAS, EuroQoL visual analog scale; IGA, Investigator's Global Assessment, VAS, visual analog scale; WPAI, Work Productivity and Activity Impairment.

## STROBE Statement—checklist of items that should be included in reports of observational studies

|                           | Item No | Recommendation                                                                                                                                                                                                                                                                                                                                                                                                                                                                                                                                                                                                                                                                                                                                                                                |
|---------------------------|---------|-----------------------------------------------------------------------------------------------------------------------------------------------------------------------------------------------------------------------------------------------------------------------------------------------------------------------------------------------------------------------------------------------------------------------------------------------------------------------------------------------------------------------------------------------------------------------------------------------------------------------------------------------------------------------------------------------------------------------------------------------------------------------------------------------|
| <b>Title and abstract</b> | 1       | (a) Indicate the study's design with a commonly used term in the title or the abstract<br><i>The abstract describes the study as a "cross-sectional analysis". Page 1.</i><br>(b) Provide in the abstract an informative and balanced summary of what was done and what was found<br><i>The abstract describes the methods and key findings. Pages 3-4.</i>                                                                                                                                                                                                                                                                                                                                                                                                                                   |
| <b>Introduction</b>       |         |                                                                                                                                                                                                                                                                                                                                                                                                                                                                                                                                                                                                                                                                                                                                                                                               |
| Background/rationale      | 2       | Explain the scientific background and rationale for the investigation being reported<br><i>The background and rationale are described in paragraphs 1-6 of the Introduction. Pages 4-6.</i>                                                                                                                                                                                                                                                                                                                                                                                                                                                                                                                                                                                                   |
| Objectives                | 3       | State specific objectives, including any prespecified hypotheses<br><i>The specific aims of the study are stated in paragraph 7 of the Introduction. Page 6.</i>                                                                                                                                                                                                                                                                                                                                                                                                                                                                                                                                                                                                                              |
| <b>Methods</b>            |         |                                                                                                                                                                                                                                                                                                                                                                                                                                                                                                                                                                                                                                                                                                                                                                                               |
| Study design              | 4       | Present key elements of study design early in the paper<br><i>The study design is described in paragraphs 1-4 and 8-10 of the Methods. Pages 6-10.</i>                                                                                                                                                                                                                                                                                                                                                                                                                                                                                                                                                                                                                                        |
| Setting                   | 5       | Describe the setting, locations, and relevant dates, including periods of recruitment, exposure, follow-up, and data collection<br><i>The setting and patient enrollment are described in paragraph 2 of the Methods. Pages 6-7.</i>                                                                                                                                                                                                                                                                                                                                                                                                                                                                                                                                                          |
| Participants              | 6       | (a) <i>Cohort study</i> —Give the eligibility criteria, and the sources and methods of selection of participants. Describe methods of follow-up<br><i>Case-control study</i> —Give the eligibility criteria, and the sources and methods of case ascertainment and control selection. Give the rationale for the choice of cases and controls<br><i>Cross-sectional study</i> —Give the eligibility criteria, and the sources and methods of selection of participants<br><i>The selection of the sample is described in paragraph 3 of the Methods. Pages 6-7.</i><br>(b) <i>Cohort study</i> —For matched studies, give matching criteria and number of exposed and unexposed<br><i>Case-control study</i> —For matched studies, give matching criteria and the number of controls per case |
| Variables                 | 7       | Clearly define all outcomes, exposures, predictors, potential confounders, and effect modifiers. Give diagnostic criteria, if applicable<br><i>Outcomes and exposures are described in the Study Measures subsection, paragraphs 4-7 of the Methods. Pages 7-8.</i>                                                                                                                                                                                                                                                                                                                                                                                                                                                                                                                           |
| Data sources/measurement  | 8*      | For each variable of interest, give sources of data and details of methods of assessment (measurement). Describe comparability of assessment methods if there is more than one group<br><i>The source of the data is reported in paragraph 3 of the Methods. Pages 6-7.</i>                                                                                                                                                                                                                                                                                                                                                                                                                                                                                                                   |
| Bias                      | 9       | Describe any efforts to address potential sources of bias<br><i>Multivariable regression modeling provided a method to address potential confounding variables, described in paragraph 9 of the Methods. Page 9.</i>                                                                                                                                                                                                                                                                                                                                                                                                                                                                                                                                                                          |

|    |                        |     |                                                                                                       |
|----|------------------------|-----|-------------------------------------------------------------------------------------------------------|
| 1  |                        |     |                                                                                                       |
| 2  | Study size             | 10  | Explain how the study size was arrived at                                                             |
| 3  |                        |     | <i>Not applicable; because this was a secondary analysis, study size was dependent on</i>             |
| 4  |                        |     | <i>enrollment in the original registry study that was the source of the data</i>                      |
| 5  |                        |     |                                                                                                       |
| 6  | Quantitative variables | 11  | Explain how quantitative variables were handled in the analyses. If applicable,                       |
| 7  |                        |     | describe which groupings were chosen and why                                                          |
| 8  |                        |     | <i>Quantitative variables, including categories for categorical variables and ranges</i>              |
| 9  |                        |     | <i>for continuous variables, are described in paragraphs 3-7 of the Methods. Pages 6-</i>             |
| 10 |                        |     | <i>8.</i>                                                                                             |
| 11 |                        |     |                                                                                                       |
| 12 | Statistical methods    | 12  | (a) Describe all statistical methods, including those used to control for confounding                 |
| 13 |                        |     | <i>Statistical methods are described in the Statistical Analysis subsection (paragraphs</i>           |
| 14 |                        |     | <i>8-10 of the Methods). Page 9.</i>                                                                  |
| 15 |                        |     |                                                                                                       |
| 16 |                        |     | (b) Describe any methods used to examine subgroups and interactions                                   |
| 17 |                        |     | <i>Not applicable</i>                                                                                 |
| 18 |                        |     |                                                                                                       |
| 19 |                        |     | (c) Explain how missing data were addressed                                                           |
| 20 |                        |     | <i>There were virtually no missing data in the dataset because variables of interest</i>              |
| 21 |                        |     | <i>were specified as “required” during data collection. This is described in paragraph</i>            |
| 22 |                        |     | <i>10 of the Methods. Page 9.</i>                                                                     |
| 23 |                        |     |                                                                                                       |
| 24 |                        |     | (d) <i>Cohort study</i> —If applicable, explain how loss to follow-up was addressed                   |
| 25 |                        |     | <i>Case-control study</i> —If applicable, explain how matching of cases and controls was              |
| 26 |                        |     | addressed                                                                                             |
| 27 |                        |     | <i>Cross-sectional study</i> —If applicable, describe analytical methods taking account of            |
| 28 |                        |     | sampling strategy                                                                                     |
| 29 |                        |     | <i>Not applicable; this was a secondary analysis of registry data</i>                                 |
| 30 |                        |     |                                                                                                       |
| 31 |                        |     | (e) Describe any sensitivity analyses                                                                 |
| 32 |                        |     | <i>Sensitivity analysis is described in paragraph 9 of the Methods. Page 9.</i>                       |
| 33 |                        |     |                                                                                                       |
| 34 | <b>Results</b>         |     |                                                                                                       |
| 35 | Participants           | 13* | (a) Report numbers of individuals at each stage of study—eg numbers potentially eligible,             |
| 36 |                        |     | examined for eligibility, confirmed eligible, included in the study, completing follow-up, and        |
| 37 |                        |     | analysed                                                                                              |
| 38 |                        |     | <i>The number of eligible patients is reported in paragraph 1 of the Results. Because this is a</i>   |
| 39 |                        |     | <i>secondary analysis, details of the numbers of patients at each stage of the study is described</i> |
| 40 |                        |     | <i>in a previous publication. Page 10.</i>                                                            |
| 41 |                        |     |                                                                                                       |
| 42 |                        |     | (b) Give reasons for non-participation at each stage                                                  |
| 43 |                        |     |                                                                                                       |
| 44 |                        |     | (c) Consider use of a flow diagram                                                                    |
| 45 |                        |     |                                                                                                       |
| 46 | Descriptive data       | 14* | (a) Give characteristics of study participants (eg demographic, clinical, social) and                 |
| 47 |                        |     | information on exposures and potential confounders                                                    |
| 48 |                        |     | <i>Descriptive data are presented in paragraphs 1-2 of the Results and in Table 1. Pages 10-15.</i>   |
| 49 |                        |     | (b) Indicate number of participants with missing data for each variable of interest                   |
| 50 |                        |     | <i>The number of participants with complete data is reported in paragraph 1 of the Results.</i>       |
| 51 |                        |     | <i>Page 10.</i>                                                                                       |
| 52 |                        |     |                                                                                                       |
| 53 |                        |     | (c) <i>Cohort study</i> —Summarise follow-up time (eg, average and total amount)                      |
| 54 |                        |     |                                                                                                       |
| 55 | Outcome data           | 15* | <i>Cohort study</i> —Report numbers of outcome events or summary measures over time                   |
| 56 |                        |     | <i>Case-control study</i> —Report numbers in each exposure category, or summary measures of           |
| 57 |                        |     | exposure                                                                                              |
| 58 |                        |     | <i>Cross-sectional study</i> —Report numbers of outcome events or summary measures                    |
| 59 |                        |     | <i>Patient-reported outcome measures ranges, stratified by disease severity, are reported in</i>      |
| 60 |                        |     | <i>subsection Patient-Reported Outcomes Descriptive Analysis Results (paragraph 3 of the</i>          |

1  
2  
3  
4  
5  
6  
7  
8  
9  
10  
11  
12  
13  
14  
15  
16  
17  
18  
19  
20  
21  
22  
23  
24  
25  
26  
27  
28  
29  
30  
31  
32  
33  
34  
35  
36  
37  
38  
39  
40  
41  
42  
43  
44  
45  
46  
47  
48  
49  
50  
51  
52  
53  
54  
55  
56  
57  
58  
59  
60*Results). Page 15.*

|                          |    |                                                                                                                                                                                                                                                                                                                                                                                                                   |
|--------------------------|----|-------------------------------------------------------------------------------------------------------------------------------------------------------------------------------------------------------------------------------------------------------------------------------------------------------------------------------------------------------------------------------------------------------------------|
| Main results             | 16 | (a) Give unadjusted estimates and, if applicable, confounder-adjusted estimates and their precision (eg, 95% confidence interval). Make clear which confounders were adjusted for and why they were included<br><i>Confounder-adjusted estimates with 95% confidence intervals are reported in the subsection Multivariable Linear Regression Model (paragraphs 4-5 of the Results) and Table 2. Pages 16-19.</i> |
|                          |    | (b) Report category boundaries when continuous variables were categorized<br><i>Category boundaries for independent variables are reported in paragraph 4 of the Methods. Dependent variables were continuous. Page 7.</i>                                                                                                                                                                                        |
|                          |    | (c) If relevant, consider translating estimates of relative risk into absolute risk for a meaningful time period<br><i>Not applicable</i>                                                                                                                                                                                                                                                                         |
| Other analyses           | 17 | Report other analyses done—eg analyses of subgroups and interactions, and sensitivity analyses<br><i>The sensitivity analysis is described in the Sensitivity Analysis subsection, paragraph 7 of the Results. Page 19.</i>                                                                                                                                                                                       |
| <b>Discussion</b>        |    |                                                                                                                                                                                                                                                                                                                                                                                                                   |
| Key results              | 18 | Summarise key results with reference to study objectives<br><i>Key results are summarized in paragraph 1 of the Discussion. Page 20.</i>                                                                                                                                                                                                                                                                          |
| Limitations              | 19 | Discuss limitations of the study, taking into account sources of potential bias or imprecision. Discuss both direction and magnitude of any potential bias<br><i>Study limitations are discussed in paragraphs 4-5 of the Discussion. Page 22.</i>                                                                                                                                                                |
| Interpretation           | 20 | Give a cautious overall interpretation of results considering objectives, limitations, multiplicity of analyses, results from similar studies, and other relevant evidence<br><i>Interpretation of the results in the context of similar studies is discussed in paragraphs 2-3 of the Discussion. Pages 20-21.</i>                                                                                               |
| Generalisability         | 21 | Discuss the generalisability (external validity) of the study results<br><i>External validity of the study results is discussed in paragraph 5 of the Discussion. Page 22.</i>                                                                                                                                                                                                                                    |
| <b>Other information</b> |    |                                                                                                                                                                                                                                                                                                                                                                                                                   |
| Funding                  | 22 | Give the source of funding and the role of the funders for the present study and, if applicable, for the original study on which the present article is based<br><i>Study funding is reported in the Footnotes section at the end of the manuscript. Page 23.</i>                                                                                                                                                 |

\*Give information separately for cases and controls in case-control studies and, if applicable, for exposed and unexposed groups in cohort and cross-sectional studies.

**Note:** An Explanation and Elaboration article discusses each checklist item and gives methodological background and published examples of transparent reporting. The STROBE checklist is best used in conjunction with this article (freely available on the Web sites of PLoS Medicine at <http://www.plosmedicine.org/>, Annals of Internal Medicine at <http://www.annals.org/>, and Epidemiology at <http://www.epidem.com/>). Information on the STROBE Initiative is available at [www.strobe-statement.org](http://www.strobe-statement.org).

# BMJ Open

## Impact of psoriasis severity on patient-reported clinical symptoms, health-related quality of life, and work productivity among US patients: real-world data from the Corrona Psoriasis Registry

|                                 |                                                                                                                                                                                                                                                                                                                                                                                                                                                                                                                |
|---------------------------------|----------------------------------------------------------------------------------------------------------------------------------------------------------------------------------------------------------------------------------------------------------------------------------------------------------------------------------------------------------------------------------------------------------------------------------------------------------------------------------------------------------------|
| Journal:                        | <i>BMJ Open</i>                                                                                                                                                                                                                                                                                                                                                                                                                                                                                                |
| Manuscript ID                   | bmjopen-2018-027535.R1                                                                                                                                                                                                                                                                                                                                                                                                                                                                                         |
| Article Type:                   | Research                                                                                                                                                                                                                                                                                                                                                                                                                                                                                                       |
| Date Submitted by the Author:   | 21-Feb-2019                                                                                                                                                                                                                                                                                                                                                                                                                                                                                                    |
| Complete List of Authors:       | Strober, Bruce; University of Connecticut Health Center; Probity Medical Research<br>Greenberg, Jeffrey; Corrona LLC; NYU School of Medicine<br>Karki, Chitra; Corrona LLC<br>Mason, Marc; Corrona LLC<br>Guo, Ning; Corrona LLC<br>Hur, Peter; Novartis Pharmaceuticals Corporation<br>Zhao, Yang; Novartis Pharmaceuticals Corporation<br>Herrera, Vivian; Novartis Pharmaceuticals Corporation<br>Lin, Feng; Novartis Pharmaceuticals Corporation<br>Lebwohl, Mark; Icahn School of Medicine at Mount Sinai |
| <b>Primary Subject Heading</b>: | Dermatology                                                                                                                                                                                                                                                                                                                                                                                                                                                                                                    |
| Secondary Subject Heading:      | Dermatology                                                                                                                                                                                                                                                                                                                                                                                                                                                                                                    |
| Keywords:                       | Psoriasis < DERMATOLOGY, Disease Severity, Health-related Quality of Life, Patient-reported Outcomes, Work Productivity                                                                                                                                                                                                                                                                                                                                                                                        |
|                                 |                                                                                                                                                                                                                                                                                                                                                                                                                                                                                                                |

SCHOLARONE™  
Manuscripts



1  
2  
3 **Impact of psoriasis severity on patient-reported clinical symptoms, health-related quality**  
4 **of life, and work productivity among US patients: real-world data from the Corrona**  
5

6  
7 **Psoriasis Registry**  
8

9  
10 **Authors:** Bruce Strober, MD, PhD<sup>1</sup>; Jeffrey D Greenberg, MD, MPH<sup>2,3</sup>; Chitra Karki, MPH<sup>2†</sup>;  
11  
12 Marc Mason, MS; Ning Guo, MS<sup>2</sup>; Peter Hur, PharmD, MBA<sup>4</sup>; Yang Zhao, PhD<sup>4\*</sup>; Vivian  
13  
14 Herrera, DDS, MPH<sup>4</sup>; Feng Lin, PhD<sup>4\*</sup>; Mark Lebwohl, MD<sup>5</sup>  
15  
16  
17  
18

19 <sup>1</sup>University of Connecticut Health Center, Farmington, CT, USA and Probitry Medical Research,  
20  
21 Waterloo, ON, Canada; <sup>2</sup>Corrona, LLC, Waltham, MA, USA; <sup>3</sup>NYU School of Medicine, New  
22  
23 York, NY, USA; <sup>4</sup>Novartis Pharmaceuticals Corporation, East Hanover, NJ, USA; <sup>5</sup>Icahn School  
24  
25 of Medicine at Mount Sinai, New York, NY, USA  
26  
27

28 \*Formerly of Novartis Pharmaceuticals Corporation  
29

30 †Formerly of Corrona, LLC  
31  
32  
33  
34

35 **Correspondence**  
36

37 Bruce Strober, MD, PhD  
38

39 Department of Dermatology, University of Connecticut Health Center, 21 South Rd, 2nd Floor,  
40  
41

42 Farmington, CT 06032, USA  
43

44 Telephone: 860-679-7692  
45

46 E-mail: strober@uchc.edu  
47  
48  
49  
50  
51  
52  
53

54 **Conflict of interest disclosure**  
55  
56  
57  
58  
59  
60

1  
2  
3 Dr. Strober has served as a consultant for AbbVie, Almirall, Amgen, Boehringer Ingelheim,  
4 Bristol-Myers-Squibb, Celgene, Dermavant, Dermira, Janssen, Leo, Eli Lilly, Leo, Medac, Meiji  
5  
6 Seika Pharma, Sebela Pharmaceuticals, Menlo Therapeutics, Novartis, Pfizer, GlaxoSmithKline,  
7  
8 UCB Pharma, Sirtris, Sun Pharma, Ortho Dermatologics/Valeant, Regeneron, Sanofi-Genzyme;  
9  
10 as an investigator for AbbVie, Celgene, Eli Lilly, Janssen, Merck, Boehringer Ingelheim,  
11  
12 GlaxoSmithKline, Pfizer, Galderma, and Sienna; as Co-scientific Director of the Corrona  
13  
14 Psoriasis Registry; and has received grant support for the University of Connecticut fellowship  
15  
16 program from AbbVie, Janssen, and the National Psoriasis Foundation. Dr. Lebwohl is an  
17  
18 employee of Mount Sinai and receives research funds from: Abbvie, Boehringer Ingelheim,  
19  
20 Celgene, Eli Lilly, Incyte, Janssen/Johnson & Johnson, Leo Pharmaceuticals, Medimmune/Astra  
21  
22 Zeneca, Novartis, Pfizer, Sciderm, Valeant, and ViDac. Dr. Lebwohl is also a consultant for  
23  
24 Allergan, Aqua, Boehringer Ingelheim, Corrona, LEO Pharma, Menlo, and Promius. Dr.  
25  
26 Greenberg is an employee and shareholder of Corrona, LLC, and has been a consultant to  
27  
28 Genentech, Janssen, Novartis, Pfizer, and Eli Lilly. Mr. Mason is an employee of Corrona, LLC,  
29  
30 and at the time of the study, was a member of the University of Delaware, Dept. of Behavioral  
31  
32 Health and Nutrition Affiliate Faculty (non-remunerative position). Ms. Guo is an employee of  
33  
34 Corrona, LLC, and Ms. Karki was an employee of Corrona, LLC, at the time of the study. Drs.  
35  
36 Herrera and Dr. Hur are employees of Novartis, and Dr. Zhao and Dr. Lin were employees of  
37  
38 Novartis at the time of the study.

39  
40  
41  
42  
43  
44  
45  
46  
47 **Running head:** Psoriasis Severity and Quality of Life  
48  
49  
50  
51  
52  
53  
54  
55  
56  
57  
58  
59  
60

## ABSTRACT

**Objectives:** This analysis examined the association between psoriasis severity, assessed by body surface area (BSA) and the Investigator's Global Assessment (IGA; previously used only in clinical trials) and patient-reported outcomes (PROs) in a real-world setting.

**Design:** Cross-sectional analysis within the Corrona Psoriasis Registry, an independent, prospective registry

**Setting:** 70 dermatology practices in the United States by May 31, 2016

**Participants:** 1529 adult patients with psoriasis being treated with biologic or nonbiologic systemic psoriasis treatment by May 31, 2016

**Primary and secondary outcome measures:** Psoriasis severity was assessed by percentage of affected BSA (mild [0–5%], moderate [>5–10%], severe [>10–15%], very severe [>15%]), and IGA scores (clear/almost clear [0–1], mild [2], moderate [3], severe [4]). PROs (pain, itch, fatigue; Dermatology Life Quality Index [DLQI]; EuroQoL Visual Analog Scale [EQ-VAS]; Work Productivity and Activity Impairment [WPAI]) were compared across BSA and IGA levels using ANOVA and chi-square tests. The association between psoriasis severity and PROs was examined using multivariable regression models.

**Results:** The mean age was 50.6 years and 47% of patients were female. Consistently with more severe psoriasis, symptoms worsened, DLQI scores increased ( $P < 0.05$  for each level of BSA and IGA), EQ-VAS decreased ( $P < 0.05$  for each level of BSA and IGA), and WPAI scores increased. By BSA score, moderate to very severe psoriasis was associated with poorer outcomes for the “impairment while working” and “daily activities impaired” WPAI domains (all  $P < 0.05$  vs mild psoriasis). Very severe psoriasis was associated with increased “work hours missed” and “work hours affected” (both  $P < 0.05$  vs mild psoriasis) Findings were similar by IGA. Results were confirmed by multivariable regression analyses.

1  
2  
3 **Conclusions:** In a real-world setting, more severe psoriasis, assessed by BSA and IGA, was  
4 consistently associated with worse PROs.  
5  
6  
7  
8  
9

### 10 **Strengths and limitations of this study**

- 11 - This is the first study to explore the link between psoriasis severity measured by the  
12 Investigator's Global Assessment (IGA) and patient reported outcomes (PROs) in a real-  
13 world setting  
14
- 15 - Due to the cross-sectional study design, causal inferences regarding the relationship  
16 between psoriasis severity and PROs cannot be made, and changes in psoriasis severity or  
17 PROs over time were not measured  
18
- 19 - Patients were recruited from specific dermatology practices, which may have been more  
20 focused on psoriasis therapy and, therefore, may not be representative of the general US  
21 psoriasis population  
22  
23  
24  
25  
26  
27  
28  
29  
30  
31  
32  
33  
34

35 **Keywords:** Psoriasis – Disease Severity – Health-related Quality of Life – Patient-reported  
36 Outcomes – Work Productivity  
37

### 38 **INTRODUCTION**

39  
40  
41  
42 Psoriasis is a chronic, immune-mediated, systemic, inflammatory, and often debilitating skin  
43 disease, affecting 2.6%–3.7% of the population in the United States (US).<sup>1</sup> With itching, pain,  
44 and scaling as its key symptoms, psoriasis can have a significant impact on patients' health-  
45 related quality of life (QoL) and work productivity, depending on disease severity.<sup>2–4</sup>  
46  
47  
48  
49

50  
51 A growing body of real-world evidence has shown greater psoriasis severity is associated with  
52 worse QoL and higher impairments in work productivity.<sup>4,5</sup> Survey data from the National  
53  
54  
55  
56  
57  
58  
59  
60  
Psoriasis Foundation in the US revealed patients with severe psoriasis had a greater likelihood of

1  
2  
3 being unemployed than those having mild disease.<sup>5</sup> In another US survey, Korman and  
4 colleagues found increased psoriasis severity was associated with more itching, pain, and  
5 scaling; poorer QoL; and greater productivity impairment.<sup>4</sup>  
6  
7

8  
9  
10 However, methods of measuring psoriasis severity are not used consistently across studies.

11  
12 Affected body surface area (BSA) is a widely known and used measure of psoriasis severity in  
13 clinical practice,<sup>6,7</sup> and dermatologists prefer this tool for evaluating patient outcomes.<sup>7</sup> Although  
14 BSA has been used in studies of psoriasis-associated QoL, BSA-defined disease severity varies  
15 across studies (eg, no/little <1%, mild 1%–2%, severe  $\geq$ 3%, as used by the National Health and  
16 Nutrition Examination Survey<sup>8</sup> vs mild 0%–<3%, moderate 3%–<10%, severe  $\geq$ 10%, as used by  
17 the National Psoriasis Foundation<sup>5</sup>). In addition, using BSA alone does not capture information  
18 regarding disease location or symptoms.<sup>7</sup>  
19  
20  
21  
22  
23  
24  
25  
26  
27

28  
29 Several other severity measures exist, with their respective strengths and limitations. The  
30 Psoriasis Area and Severity Index (PASI) score is the most widely used and most thoroughly  
31 validated severity measure as a primary endpoint in clinical trials. However, it has not been  
32 employed routinely in clinical practice and tends to be poorly understood by clinicians and  
33 patients.<sup>6,9,10</sup> In addition, it shows low sensitivity to changes in disease severity in cases with low  
34 BSA involvement (ie, <10%).<sup>6</sup> The physician's global assessment (PGA) has been described as  
35 being easier to understand compared with the PASI and more similar to assessments of disease  
36 used in clinical practice.<sup>10</sup> However, definitions and criteria for points within the PGA values  
37 lack standardization, and expert consensus has not yet been reached.<sup>9</sup> Further, a large  
38 discordance may exist between PGA and BSA, resulting in either an over- or underestimate of  
39 true disease severity.<sup>11</sup>  
40  
41  
42  
43  
44  
45  
46  
47  
48  
49  
50  
51  
52  
53

54 The 5-point investigator's global assessment (IGA) modified (mod) 2011 scale is typically used  
55 in clinical trials and gauges psoriasis severity according to the patient's degree of skin redness,  
56  
57  
58  
59

1  
2  
3 thickening, and scaling. Its advantage over other tools (6-point IGA and PGA) is that it more  
4 narrowly defines the lowest level of disease severity.<sup>9</sup> However, the IGA mod 2011 scale has not  
5  
6 been examined in real-world studies of psoriasis-associated QoL.  
7  
8

9  
10 Although the IGA mod 2011 scale provides a useful framework for the assessment of disease  
11 features, use of this scale alone and without accounting for BSA may not accurately reflect  
12 disease severity. In clinical practice, physicians may use a combination of objective assessments  
13 of psoriasis severity, such as the IGA mod 2011 scale, BSA, and symptoms, and more subjective  
14 measures, such as the emotional impact of psoriasis on the patient.<sup>6</sup>  
15  
16

17 This analysis aims to define the relationship between psoriasis severity and symptom severity,  
18 QoL, and work productivity among US patients with psoriasis in a real-world setting. Separate  
19 analyses were conducted, with psoriasis severity defined using both BSA and IGA.  
20  
21

## 22 **METHODS**

### 23 **Study Design**

24 A cross-sectional study was conducted using the enrollment data from the Corrona Psoriasis  
25 Registry to identify associations between disease severity and patient-reported outcomes (PROs).  
26  
27

### 28 **Patient and Public Involvement**

29 Patients were not involved in determining the design, the recruitment to, or the conduct of this  
30 study. All patients enrolled in the Corrona Psoriasis Registry receive a patient newsletter that  
31 shares study results twice per year.  
32  
33

### 34 **Data Source**

1  
2  
3 The Corrona Psoriasis Registry is an independent, prospective observational cohort launched in  
4 April 2015 in collaboration with the National Psoriasis Foundation, with a target enrollment of  
5 10,000 patients with psoriasis from 200 sites throughout the US. The study inclusion criteria  
6 matched those for registry enrollment: Patients must be at least 18 years old, must have been  
7 given a psoriasis diagnosis by a dermatologist, and had to have begun treatment with a qualifying  
8 biologic or nonbiologic systemic psoriasis treatment either within the 12 months preceding or on  
9 the day of the enrollment visit. Data collected from the registry launch date (April 2015) through  
10 May 31, 2016 were analyzed for the study.  
11  
12  
13  
14  
15  
16  
17  
18  
19  
20  
21  
22  
23

## 24 **Study Measures**

25  
26 Data related to demographics, disease severity (BSA and IGA scores), disease duration, prior and  
27 current use of systemic treatments for psoriasis, physician-reported medical history (eg,  
28 cardiovascular disease, diabetes mellitus, cardiovascular disease and diabetes risk factors,  
29 lymphoma/malignancy, Crohn's disease, anxiety/depression), and PROs collected at registry  
30 enrollment were examined. Patients reported their levels of pain, itching, and fatigue on a visual  
31 analog scale (VAS) of 0 (none) to 100 (very severe) and completed 2 validated and commonly  
32 used health-related quality-of-life (HRQoL) assessment instruments: the Dermatology Life  
33 Quality Index (DLQI)<sup>12</sup> and the visual analog component of the EuroQoL Five Dimensions  
34 Questionnaire VAS (EQ-VAS).<sup>13</sup> In addition, the patients completed the Work Productivity and  
35 Activity Impairment (WPAI) questionnaire.<sup>14</sup> Dermatologists assessed disease severity in terms  
36 of the percentage of total BSA affected and/or the IGA mod 2011 scale score. BSA percentages  
37 were categorized as mild (0–5%), moderate (>5–10%), severe (>10–15%), and very severe  
38 (>15%). The 5-point IGA was used to categorize levels of skin induration, scaling, and redness  
39 as clear/almost clear (0–1), mild (2), moderate (3), and severe (4).  
40  
41  
42  
43  
44  
45  
46  
47  
48  
49  
50  
51  
52  
53  
54  
55  
56  
57  
58  
59  
60

### Dermatology Life Quality Index

The DLQI, which is a dermatology-specific tool to measure HRQoL, requires respondents to answer 10 questions classified within 6 domains: symptoms and feelings, daily activities, leisure activities, work and school, personal relationships, and treatment. Respondents indicate the degree to which they experienced problems for a recall period of 1 week, and responses are assessed with a 4-point Likert scale: 0 (not at all/not relevant), 1 (a little), 2 (a lot), and 3 (very much). Responses are calculated for the total DLQI score, which is 0–30. Higher scores indicate worse HRQoL.

### EuroQol Visual Analog Scale

The EuroQol Visual Analog Scale (EQ-VAS) is a non-disease-specific HRQoL assessment tool in which respondents indicate their state of health on the day of assessment on a scale of 0–100, with 100 being the best imaginable state of health and 0 being the worst imaginable state of health.

### Work Productivity and Activity Impairment

The WPAI questionnaire measures impairment in work hours missed, work productivity and impairment, and daily activities. Based on a scale of 1 (no effect) to 10 (completely prevented patient from working/participating), respondents report the following domains for the previous week: work hours missed, work hours affected, impairment while working, and daily activities impaired. Daily activities include housework, shopping, exercise, and studying. Responses for all domains, except for daily activities, are valid only if the respondent is employed.



### Statistical Analysis

Data regarding patient characteristics, disease characteristics, comorbidities, treatment history, and PROs collected at registry enrollment were reported for the overall study population and by BSA and IGA disease severity groups. Frequency counts and percentages were reported for all categorical variables (sex, employment status, disability status, psoriatic arthritis diagnosis, treatment history, and history of comorbidities). Means and standard deviations (SDs) were reported for all continuous variables (age, body mass index [BMI], psoriasis duration, BSA, and IGA). Significance testing with analysis of variance (ANOVA) was used for continuous variables, and chi-square tests of association were employed for categorical variables to investigate if any differences in values were present across the levels of BSA and IGA disease severity.

Multivariable linear regression was used to model the association between disease severity levels and PROs. To address potential confounding, the model adjusted a priori for age, gender, disease duration, and BMI at enrollment. IGA and BSA were modeled separately. Ordinal regression modeling was performed as a confirmatory sensitivity analysis.

Statistical analyses included patients who had complete data on analysis variables at enrollment. To minimize the potential impact of missing data, variables of interest were specified as “required” during data collection; therefore, no statistical techniques were needed to account for missing data. All analyses were performed using STATA (StataCorp LP 2015, Stata Statistical Software: Release 14, Version 2, College Station, TX) with significance set at the  $P < 0.05$  level.

### Protection of Patients

1  
2  
3 The study used blinded data to maintain patient confidentiality. The Corrona Psoriasis Registry  
4 was approved by both local and central review boards at the participating sites. All patients  
5 provided written informed consent prior to their enrollments in the registry.  
6  
7  
8  
9

## 10 11 12 **RESULTS**

### 13 14 **Study Sample Characteristics**

15  
16 As of May 31, 2016, 1529 patients were enrolled in the registry; the mean age was 50 years and  
17 47% were female. Among these patients, 1525 had complete BSA data and 1527 had complete  
18 IGA data, and the BSA and IGA patients were similar in age and gender types. No patients were  
19 omitted from the analysis, but some did not have complete data sets.  
20  
21

22  
23 Similar proportions of patients were biologic experienced and had prior nonbiologic systemic  
24 therapy across disease severity groups (BSA and IGA). The proportion of patients who were  
25 biologic experienced ranged from 53%–59% across BSA categories and 53%–57% across IGA  
26 categories. Proportions of patients who had been treated with nonbiologic systemic therapies  
27 ranged from 45%–49% across BSA categories, and 42%–54% across IGA categories. The  
28 disease severity groups also had similar disease durations (**Table 1**).  
29  
30  
31  
32  
33  
34  
35  
36  
37  
38  
39  
40  
41  
42  
43  
44  
45  
46  
47  
48  
49  
50  
51  
52  
53  
54  
55  
56  
57  
58  
59  
60

**Table 1. Baseline patient characteristics by BSA and IGA severity categories**

|                                                    | BSA Severity Groups (n = 1525) |                                  |                                     |                                      | IGA Severity Groups (n = 1527)                 |                      |                                |                        |
|----------------------------------------------------|--------------------------------|----------------------------------|-------------------------------------|--------------------------------------|------------------------------------------------|----------------------|--------------------------------|------------------------|
|                                                    | Mild:<br>0–5%<br>(n =<br>873)  | Moderate:<br>>5–10%<br>(n = 316) | Severe:<br>>10–<br>15%<br>(n = 109) | Very<br>Severe:<br>>15%<br>(n = 227) | Clear/<br>almost<br>clear:<br>0/1<br>(n = 375) | Mild: 2<br>(n = 404) | Moderate:<br>e: 3<br>(n = 586) | Severe: 4<br>(n = 162) |
| <b>Patient characteristics</b>                     |                                |                                  |                                     |                                      |                                                |                      |                                |                        |
| Female, n (%)                                      | 439 (50)                       | 136 (43)                         | 53 (49)                             | 88 (39)                              | 186 (50)                                       | 205 (51)             | 262 (45)                       | 64 (40)                |
| Age (years), mean (SD)                             | 50.6<br>(14.4)                 | 50.8<br>(13.9)                   | 49.8<br>(14.8)                      | 50.4<br>(14.9)                       | 50 (14.3)                                      | 51.5<br>(14.8)       | 50.7<br>(14.1)                 | 49.5<br>(14.9)         |
| Body weight (kg), mean<br>(SD)                     | 87.5<br>(22.2)                 | 88.7<br>(24.8)                   | 92.3<br>(23.8)                      | 95.4<br>(27.3)                       | 85.6<br>(19.6)                                 | 89.6<br>(24.3)       | 90.0<br>(25.3)                 | 94.1<br>(24.9)         |
| Body mass index (kg/m <sup>2</sup> ),<br>mean (SD) | 30.1<br>(6.8)                  | 30.2 (7.3)                       | 32.0 (8.1)                          | 32.2 (8.4)                           | 29.2 (5.7)                                     | 31.0 (7.6)           | 30.8 (7.7)                     | 32.0 (8.0)             |
| Employed, n (%)                                    | 575 (66)                       | 209 (67)                         | 72 (66)                             | 137 (61)                             | 261 (70)                                       | 258 (64)             | 374 (64)                       | 101 (63)               |

|                                          |                |                |                |                |                |                |                |                |
|------------------------------------------|----------------|----------------|----------------|----------------|----------------|----------------|----------------|----------------|
| Disabled, n (%)                          | 59 (7)         | 28 (9)         | 8 (7)          | 31 (14)        | 20 (5)         | 22 (5)         | 60 (10)        | 24 (15)        |
| <b>Disease characteristics</b>           |                |                |                |                |                |                |                |                |
| Psoriasis duration (years),<br>mean (SD) | 15.6<br>(13.8) | 15.1<br>(12.9) | 15.7<br>(13.7) | 17.2<br>(13.4) | 15.8<br>(13.2) | 17.0<br>(14.8) | 15.2<br>(13.2) | 14.1<br>(12.4) |
| Psoriatic arthritis<br>diagnosis, n (%)  | 369 (42)       | 120 (38)       | 37 (34)        | 90 (40)        | 152 (41)       | 165 (41)       | 223 (38)       | 78 (48)        |
| <b>Treatment history</b>                 |                |                |                |                |                |                |                |                |
| Biologic naïve, n (%)                    | 410 (47)       | 148 (47)       | 48 (44)        | 93 (41)        | 165 (44)       | 188 (47)       | 277 (47)       | 70 (43)        |
| Biologic experienced, n<br>(%)           | 463 (53)       | 168 (53)       | 61 (56)        | 134 (59)       | 210 (56)       | 216 (53)       | 309 (53)       | 92 (57)        |
| Nonbiologic systemic<br>therapy, n (%)   | 389 (45)       | 141 (45)       | 52 (48)        | 111 (49)       | 169 (45)       | 170 (42)       | 268 (46)       | 88 (54)        |
| <b>Psoriasis severity</b>                |                |                |                |                |                |                |                |                |
| BSA (%), mean (SD)                       | 2.2 (1.7)      | 8.3 (1.6)      | 13.4 (1.5)     | 34.8<br>(18.8) | 1.3 (3.3)      | 5.7 (8.5)      | 11.7<br>(12.1) | 26.6<br>(21.9) |
| IGA, mean (SD)                           | 1.7 (1.1)      | 2.8 (0.6)      | 3.1 (0.5)      | 3.3 (0.7)      | 0.6 (0.5)      | 2.0 (0.0)      | 3.0 (0.0)      | 4.0 (0.0)      |

| <b>History of comorbidities</b>                     |          |          |         |          |          |          |          |         |
|-----------------------------------------------------|----------|----------|---------|----------|----------|----------|----------|---------|
| Cardiovascular disease, n (%)                       | 103 (12) | 35 (11)  | 13 (12) | 30 (13)  | 48 (13)  | 52 (13)  | 66 (11)  | 16 (10) |
| Coronary artery disease, n (%)                      | 25 (3)   | 4 (1)    | 2 (2)   | 12 (5)   | 9 (2)    | 16 (4)   | 12 (2)   | 6 (4)   |
| Congestive heart failure, n (%)                     | 7 (1)    | 9 (3)    | 0 (0)   | 5 (2)    | 3 (1)    | 5 (1)    | 11 (2)   | 2 (1)   |
| Stroke, n (%)                                       | 15 (2)   | 3 (1)    | 2 (2)   | 1 (0)    | 6 (2)    | 8 (2)    | 6 (1)    | 1 (1)   |
| Cardiovascular disease/diabetes risk factors, n (%) | 413 (47) | 159 (50) | 51 (47) | 113 (50) | 167 (45) | 190 (47) | 296 (51) | 84 (52) |
| Hypertension, n (%)                                 | 327 (38) | 126 (40) | 45 (41) | 95 (42)  | 139 (37) | 152 (38) | 239 (41) | 64 (40) |
| Hyperlipidemia, n (%)                               | 253 (29) | 97 (31)  | 23 (21) | 60 (26)  | 96 (26)  | 123 (31) | 168 (29) | 46 (28) |
| Metabolic syndrome, n (%)                           | 13 (1)   | 3 (1)    | 3 (3)   | 7 (3)    | 5 (1)    | 8 (2)    | 7 (1)    | 6 (4)   |
| Diabetes mellitus, n (%)                            | 111 (13) | 50 (16)  | 17 (16) | 38 (17)  | 40 (11)  | 55 (14)  | 92 (16)  | 29 (18) |

|                            |          |         |         |         |         |         |          |         |
|----------------------------|----------|---------|---------|---------|---------|---------|----------|---------|
| Lymphoma/malignancy, n (%) | 40 (5)   | 20 (6)  | 5 (5)   | 9 (4)   | 18 (5)  | 17 (4)  | 34 (6)   | 5 (3)   |
| Crohn's disease, n (%)     | 4 (0)    | 3 (1)   | 0 (0)   | 1 (0)   | 2 (1)   | 3 (1)   | 2 (0)    | 1 (1)   |
| Depression, n (%)          | 161 (18) | 58 (18) | 24 (22) | 48 (21) | 56 (15) | 79 (20) | 120 (20) | 36 (22) |
| Anxiety, n (%)             | 154 (18) | 52 (16) | 25 (23) | 44 (19) | 69 (18) | 75 (19) | 98 (17)  | 33 (20) |

BSA, body surface area; IGA, Investigator's Global Assessment; SD, standard deviation.

History of comorbidities/medical history: cardiovascular disease: combined histories of myocardial infarction, acute coronary syndrome, coronary artery disease, congestive heart failure, peripheral artery disease, cardiac revascularization procedure, ventricular arrhythmia, cardiac arrest, unstable angina, stroke, transient ischemic attack, pulmonary embolism, carotid artery disease, deep vein thrombosis or other cardiovascular event; cardiovascular/diabetes risk factors: hypertension, hyperlipidemia, or metabolic syndrome;

lymphoma/malignancy: lymphoma, breast, lung, skin (excluding nonmelanoma skin cancer), or other.

Prior use of biologics: adalimumab, alefacept, certolizumab, efalizumab, etanercept, golimumab, infliximab, ixekizumab, secukinumab, ustekinumab, investigational drugs, and other patient-specified biologics.

Prior use of nonbiologics: acitretin, apremilast, cyclosporine, hydroxyurea, methotrexate, mycophenolate, mofetil, sulfasalazine, tofacitinib, 6-thioguanine, and other patient-specified nonbiologics.

1  
2  
3 The most common comorbidities were hypertension (BSA range: 38%–42%; IGA range: 37%–  
4 41%), hyperlipidemia (BSA range: 21%–31%; IGA range: 26%–31%), depression (BSA range  
5 18%–22%; IGA range 15%–22%), and anxiety (BSA range: 16%–23%; IGA range: 17%–20%;  
6  
7  
8  
9  
10 **Table 1**). Across BSA and IGA groups, at least 60% of patients worked full-time or part-time.  
11  
12 Increasing proportions of patients were disabled as severity increased according to BSA (range:  
13 7%–14%) and IGA (range: 5%–15%; **Table 1**).

### 19 **Patient-Reported Outcomes Descriptive Analysis Results**

20  
21  
22 Fatigue, itching, and pain VAS scores worsened with disease severity as assessed by both BSA  
23 and IGA (**Figures 1A and 1B**). Across BSA categories, mean fatigue scores ranged from 26.5–  
24 40.2, itching was 24.7–55.7, and pain was 15.2–41.7. Among IGA categories, mean fatigue  
25 scores ranged from 21.9–41.8, itching was 12.1–57.3, and pain was 7.4–44.3.

26  
27  
28  
29  
30  
31 DLQI scores worsened and EQ-VAS health status decreased with increasing disease severity  
32 (**Figures 2A and 2B and Figures 3A and 3B**). Across BSA and IGA categories, mean DLQI  
33 scores ranged from 5.2–10.2 and 4.3–9.7, respectively. Mean EQ-VAS scores ranged from 62.9  
34 (very severe) to 76.4 (mild) across BSA categories and 62.1 (severe) to 78.8 (clear/almost clear)  
35 across IGA categories, with higher scores indicating better health. Work productivity impairment  
36 also increased with greater disease severity (**Figures 4A and 4B**). By BSA category, the “work  
37 hours missed” domain was 2.3%–5.9%, “impairment while working” was 8.4%–19.0%, “work  
38 hours affected” was 9.5%–20.0%, and “daily activities impaired” was 13.1%–31.5%. By IGA  
39 category, the “work hours missed” domain was 1.2%–4.2%, “impairment while working” was  
40 5.5%–19.9%, “work hours affected” was 6.0%–20.9%, and “daily activities impaired” was  
41 8.2%–34.1%.

## Multivariable Linear Regression Model

The multivariable linear regression models confirmed the overall pattern in the descriptive results, demonstrating an association between greater disease severity when assessed by BSA and IGA, and worsening symptoms, worse QoL, and greater work productivity and activity impairment. Worsening itch, pain, and fatigue were significantly associated with increases in BSA and IGA levels:  $P < 0.001$  for moderate, severe, and very severe BSA (reference: mild) and for mild, moderate, and severe IGA (reference: clear/almost clear). Overall DLQI and EQ-VAS scores also worsened with disease severity ( $P < 0.05$  for each level of BSA and IGA) (

### Table 2).

In BSA models, the moderate, severe, and very severe psoriasis categories were significantly associated with poorer outcomes in the WPAI domains of “impairment while working” and “daily activities impaired” compared with mild severity (all  $P < 0.05$ ) (Table 2). Very severe disease was significantly associated with increased “work hours missed” ( $P < 0.05$ ), and moderate and very severe disease were associated with increased “work hours affected” (both  $P < 0.05$ ) compared with mild disease.

**Table 2. Linear regression results by BSA and IGA severity**

|                                 | BSA Severity Groups      |                 |                   | IGA Severity Groups                   |             |           |
|---------------------------------|--------------------------|-----------------|-------------------|---------------------------------------|-------------|-----------|
|                                 | (reference = mild: 0–5%) |                 |                   | (reference = clear/almost clear: 0/1) |             |           |
| Parameter, coefficient (95% CI) | Moderate: >5–10%         | Severe: >10–15% | Very severe: >15% | Mild: 2                               | Moderate: 3 | Severe: 4 |
| Symptoms                        |                          |                 |                   |                                       |             |           |



|                               |                              |                               |                                |                               |                                |                                  |
|-------------------------------|------------------------------|-------------------------------|--------------------------------|-------------------------------|--------------------------------|----------------------------------|
| Fatigue                       | 9.50<br>(5.87, 13.14)*       | 13.13<br>(7.49,<br>18.76)*    | 12.67<br>(8.52,<br>16.82)*     | 7.52 (3.55,<br>11.49)*        | 12.45 (8.79,<br>16.11)*        | 19.69<br>(14.48,<br>24.91)*      |
| Itch                          | 23.17<br>(19.27,<br>27.06)*  | 25.42<br>(19.40,<br>31.44)*   | 32.10<br>(27.66,<br>36.54)*    | 18.27<br>(14.21,<br>22.33)*   | 37.15<br>(33.41,<br>40.90)*    | 45.70<br>(40.36,<br>51.04)*      |
| Pain                          | 15.09<br>(11.46,<br>18.71)*  | 19.37<br>(13.76,<br>24.97)*   | 27.68<br>(23.55,<br>31.82)*    | 10.36 (6.48,<br>14.24)*       | 25.15<br>(21.57,<br>28.72)*    | 37.37<br>(32.27,<br>42.47)*      |
| <b>DLQI</b>                   | 1.91<br>(1.17, 2.66)*        | 3.40<br>(2.25,<br>4.56)*      | 5.26<br>(4.41,<br>6.11)*       | 0.85 (0.04,<br>1.67)*         | 3.76 (3.01,<br>4.52)*          | 5.47 (4.40,<br>6.55)*            |
| <b>EQ-VAS</b>                 | -5.14<br>(-7.91, -<br>2.36)* | -7.34<br>(-11.64, -<br>3.04)* | -12.98<br>(-16.14, -<br>9.81)* | -3.47 (-<br>6.51, -<br>0.43)* | -7.35 (-<br>10.16, -<br>4.55)* | -15.15 (-<br>19.15, -<br>11.55)* |
| <b>WPAI<br/>questionnaire</b> |                              |                               |                                |                               |                                |                                  |
| Work time<br>missed           | 0.58<br>(-1.38, 2.55)        | -0.71<br>(-3.68,<br>2.26)     | 3.50<br>(1.17,<br>5.82)*       | 1.13 (-1.01,<br>3.27)         | 2.96 (1.01,<br>4.92)*          | 2.87 (0.01,<br>5.73)*            |
| Impairment<br>while working   | 8.00<br>(4.58, 11.39)*       | 5.22<br>(0.06,<br>10.39)*     | 11.52<br>(7.49,<br>15.55)*     | 2.87 (-0.78,<br>6.53)         | 11.56 (8.22,<br>14.91)*        | 15.14<br>(10.29,<br>20.00)*      |

|                              |                         |                            |                             |                        |                             |                             |
|------------------------------|-------------------------|----------------------------|-----------------------------|------------------------|-----------------------------|-----------------------------|
| Working hours<br>affected    | 8.79<br>(5.20, 12.37)*  | 5.17<br>(-0.27,<br>10.61)  | 11.44<br>(7.19,<br>15.70)*  | 3.49 (-0.35,<br>7.33)* | 13.05 (9.54,<br>16.55)*     | 15.65<br>(10.54,<br>20.77)* |
| Daily activities<br>affected | 10.28<br>(7.01, 13.54)* | 11.54<br>(6.50,<br>16.59)* | 19.69<br>(15.97,<br>23.40)* | 7.88 (4.34,<br>11.42)* | 15.04<br>(11.78,<br>18.31)* | 26.36<br>(21.70,<br>31.01)* |

\*Significant at  $P < 0.05$ .

BSA, body surface area; CI, confidence interval; DLQI, Dermatology Life Quality Index; EQ-VAS, EuroQoL visual analog scale; IGA, Investigator's Global Assessment, WPAI, Work Productivity and Activity Impairment.

Fatigue, itch, and pain symptom scale: 0–100; DLQI scale: 0–30; EQ-VAS scale: 0–100; WPAI scale: 0–10.

All models adjusted a priori for age, gender, psoriasis duration, and body mass index at registry enrollment.

1  
2  
3  
4  
5 In IGA models, mild, moderate, and severe psoriasis categories were significantly associated  
6 with worse outcomes for the WPAI domain of “daily activities impaired” compared with  
7 clear/almost clear (all  $P < 0.05$ ). Compared with the mild psoriasis category, moderate and  
8 severe psoriasis categories were significantly associated with poorer outcomes in the domains of  
9 “work hours missed,” “impairment while working,” and “work hours affected” (all  $P < 0.05$ ).  
10  
11  
12  
13  
14  
15  
16  
17  
18

### 19 Sensitivity Analysis

20 Ordinal regression modeling was performed as a sensitivity analysis to confirm the results of the  
21 linear regression; results confirmed a consistent trend, with increasing severity of disease  
22 associated with worsening QoL and greater impairment in work productivity and activity.  
23  
24  
25  
26  
27

28 Results of the proportional odds models for BSA and IGA disease severity categories are shown  
29 in **Supplementary Table 1**.  
30  
31  
32  
33  
34  
35  
36  
37  
38  
39  
40  
41  
42  
43  
44  
45  
46  
47  
48  
49  
50  
51  
52  
53  
54  
55  
56  
57  
58  
59  
60

## DISCUSSION

In this cross-sectional analysis of the Corrona Psoriasis Registry, multivariable linear regression models showed patient-reported symptoms, QoL, and work productivity worsened with increasing disease severity, as measured by BSA and IGA. The results were statistically significant across all levels of psoriasis severity for patient-reported pain, itch, and fatigue; DLQI overall scores; EQ-VAS; and the “daily activities impaired” domain of the WPAI questionnaire. For the WPAI domains “work hours missed,” “impairment while working,” and “work hours affected” outcomes were significantly worse for patients with the highest severity of psoriasis (BSA = very severe, IGA = severe). Findings were overall consistent between the BSA and IGA results.

To the authors’ knowledge, the present study was the first to explore the link between IGA and PROs in a real-world setting. Physician’s Global Assessment has been used previously in real-world settings in both postmarketing safety studies<sup>15,16</sup> and patient registries.<sup>16-19</sup> A multicenter, prospective study conducted in Spain found psoriasis severity was the primary factor affecting QoL. Although PGA data were collected in that study, PASI was ultimately used for the multivariate modeling.<sup>20</sup>

Of note, the BSA and IGA categories as defined in the present study differ somewhat from those used in prior research. The present study used the 5-point mod 2011 scale, which differs from the 6-point scales used in some clinical trials of biologic treatments for psoriasis<sup>9</sup> in that the “almost clear” category is more narrowly defined compared with the “minimal” category in PGA and the other IGA versions.<sup>9</sup> The category cutoff points for BSA used in the present study (ie, mild: 0%–5%, moderate: >5%–10%, severe: >10%–15%, and very severe: >15%) also differed from those that have been used in certain studies and referred to in guidelines and expert consensus

1  
2  
3 statements (eg, mild 0%–<3%, moderate 3%–<10%, and severe  $\geq 10\%$ ;<sup>5</sup> moderate to severe  
4  
5 >10%<sup>21</sup>, no/little <1%, mild 1%–2%, severe  $\geq 3\%$  <sup>8</sup>). The addition of the “very severe” category  
6  
7  
8 in the present study may shed light on specific unmet medical needs in this segment of the  
9  
10 population with psoriasis. Further research is required to fully understand how differences in  
11  
12 BSA categorization may impact results across clinical trials and observational studies.

13  
14  
15 In a prior study by Korman *et al* of psoriasis severity and PROs, severity of symptoms, EQ-5D,  
16  
17 DLQI, and WPAI domains were assessed using BSA category (mild, moderate, or severe as  
18  
19 determined by a physician).<sup>4</sup> Although the categorization of psoriasis severity differed, the  
20  
21 results are generally consistent with the findings of the present study, for which severity of  
22  
23 fatigue, itching, and pain; DLQI total scores; and WPAI domains worsened with increasing  
24  
25 disease severity.<sup>4</sup> In addition, lower EQ-5D summary scores were reported with increasing  
26  
27 disease severity,<sup>4</sup> similar to the lower EQ-VAS scores observed in the present study.

28  
29  
30  
31 Although the present study demonstrates the association between increased psoriasis severity and  
32  
33 worsened PROs, future research may clarify this relationship. The present analysis did not  
34  
35 address the potential for the outcomes of interest to be highly correlated with one another. For  
36  
37 instance, previous research by Lewis-Beck *et al.* found an inverse relationship between itching,  
38  
39 pain, and scaling severity and work productivity.<sup>22</sup> Further research may investigate how QoL  
40  
41 and work productivity measures may interact with one another in the context of psoriasis  
42  
43 severity. In addition, due to the cross-sectional study design, the results represent psoriasis  
44  
45 severity and PROs at one timepoint. Future research using longitudinal data could show how  
46  
47 changes in psoriasis severity may relate to changes over time in QoL and work productivity. In  
48  
49 addition, particularly for a longitudinal study, the combination and interaction of BSA and IGA  
50  
51 as a single measure of severity could prove informative.  
52  
53  
54  
55  
56  
57  
58  
59  
60

1  
2  
3 The results of this study must be interpreted in the context of the source of the data, study design,  
4 and analysis methods. First, this study was a cross-sectional analysis, which does not allow for  
5 causal inferences regarding psoriasis severity and the outcomes of interest. Second, the patients  
6 enrolled in the registry were recruited from specific dermatology practices, which may have been  
7 more focused on psoriasis therapy and, therefore, may not be representative of the general US  
8 psoriasis population. The linear regression model was robust to the non-normal distribution of  
9 the data; however, estimates at the extreme lower and upper levels of severity may have been  
10 over- or underestimated.  
11  
12  
13  
14  
15  
16  
17  
18  
19  
20  
21  
22  
23

## 24 **CONCLUSIONS**

25  
26 Increased psoriasis severity as measured by both BSA and IGA categories was associated with  
27 worsened PROs in this US-based psoriasis registry study. Future research is warranted to  
28 understand the potential interrelationships between PROs and to understand whether longitudinal  
29 improvements in psoriasis severity are associated with improvements in PROs.  
30  
31  
32  
33  
34  
35  
36  
37  
38  
39  
40  
41  
42  
43  
44  
45  
46  
47  
48  
49  
50  
51  
52  
53  
54  
55  
56  
57  
58  
59  
60

## FOOTNOTES

**Contributors:** BS interpreted the results, critically reviewed the manuscript, and agreed to be accountable for all aspects of the manuscript. JDG helped design the study, acquired the data, critically reviewed the manuscript, and agreed to be accountable for all aspects of the manuscript. CK helped design the study, interpreted the results, and critically reviewed the manuscript. MM helped design the study, collected the data, undertook the data analysis, interpreted the results, and critically reviewed the manuscript. NG undertook the data analysis, interpreted the results, and critically reviewed the manuscript. PH helped design the study, interpreted the results, and critically reviewed the manuscript. YZ helped design the study, interpreted the results, and critically reviewed the manuscript. VH interpreted the results and critically reviewed the manuscript. FL helped design the study, interpreted the results, and critically reviewed the manuscript. ML helped design the study, acquired the data, and critically reviewed the manuscript.

**Funding:** This study was sponsored by Corrona, LLC and the analysis was funded by Novartis. Access to study data was limited to Corrona and Corrona statisticians completed all of the analysis; all authors contributed to the interpretation of the results. Corrona has been supported through contracted subscriptions in the last 2 years by AbbVie, Amgen, Boehringer Ingelheim, Bristol-Myers Squibb, Celgene, Crescendo, Eli Lilly and Company, Genentech, Gilead, GSK, Janssen, Momenta Pharmaceuticals, Novartis, Pfizer Inc., Regeneron, Roche, Merck, UCB, and Valeant.

Parts of this manuscript were presented as a poster March 3–7, 2017 at 75th Annual Meeting of the American Academy of Dermatology in Orlando, Florida, USA.

**Competing interests:** BS has served as a consultant for AbbVie, Almirall, Amgen, AstraZeneca, Boehringer Ingelheim, Celgene, Dermira, Galderma, GlaxoSmithKline, Eli Lilly, Janssen, LEO

1  
2  
3 Pharma, Medac, Meiji Seika Pharma, Menlo Therapeutics, Novartis, Ortho  
4  
5 Dermatologics/Valeant, Pfizer, Regeneron, Sanofi-Genzyme, Sun Pharma, UCB Pharma; as Co-  
6  
7 scientific Director of the Corrona Psoriasis Registry; and has received grant support for the  
8  
9 University of Connecticut fellowship program from AbbVie and Janssen. ML is an employee of  
10  
11 Mount Sinai and receives research funds from: Abbvie, Boehringer Ingelheim, Celgene, Eli  
12  
13 Lilly, Incyte, Janssen/Johnson & Johnson, Leo Pharmaceuticals, Medimmune/Astra Zeneca,  
14  
15 Novartis, Pfizer, Sciderm, Valeant, and ViDac. ML is also a consultant for Allergan, Aqua,  
16  
17 Boehringer Ingelheim, Corrona, LEO Pharma, Menlo, and Promius. JDG is an employee and  
18  
19 shareholder of Corrona, LLC, and has been a consultant to Genentech, Janssen, Novartis, Pfizer,  
20  
21 and Eli Lilly. MM is an employee of Corrona, LLC, and at the time of the study, was a member  
22  
23 of the University of Delaware, Dept. of Behavioral Health and Nutrition Affiliate Faculty (non-  
24  
25 remunerative position). NG is an employee of Corrona, LLC, and CK was an employee of  
26  
27 Corrona, LLC, at the time of the study. VH and PH are employees of Novartis, and YZ and FL  
28  
29 were employees of Novartis at the time of the study.  
30  
31  
32  
33  
34

35 **Patient consent:** All patients were required to provide written, informed consent prior to  
36  
37 participating.  
38  
39

40 **Ethics approval:** All participating investigators were required to obtain full board approval for  
41  
42 research involving human subjects through a central institutional review board (IntegReview).  
43  
44 For academic investigative sites that did not receive a waiver to use the central IRB, full board  
45  
46 approval was obtained for the respective governing IRB, and documentation of approval was  
47  
48 submitted to the sponsor prior to initiating any study procedures.  
49  
50

51 **Data sharing statement:** No additional data are available.  
52  
53

#### 54 **Acknowledgments**

55  
56  
57  
58  
59  
60



1  
2  
3 Access to study data was limited to Corrona, and Corrona statisticians completed all of the  
4  
5 analysis; all authors contributed to the interpretation of the results. Corrona has been supported  
6  
7 through contracted subscriptions in the last 2 years by AbbVie, Amgen, Boehringer Ingelheim,  
8  
9 Bristol-Myers Squibb, Celgene, Crescendo, Eli Lilly and Company, Genentech, Gilead, GSK,  
10  
11 Janssen, Merck, Momenta Pharmaceuticals, Novartis, Pfizer, Regeneron, Roche, UCB, and  
12  
13 Valeant. Novartis participated in the interpretation of data, review, and approval of the  
14  
15 manuscript.  
16  
17

18  
19 The authors take full responsibility for the content of the paper. They thank Jacob Willet, Karen  
20  
21 Kurtyka, and Lisa Kaspin-Powell (Oxford PharmaGenesis Inc, Newtown, PA, USA) for medical  
22  
23 writing support, editorial assistance, and collation and incorporation of comments from all  
24  
25 authors. These services were funded by Novartis Pharmaceutical Corporation, East Hanover, NJ,  
26  
27 USA. The authors also thank all patients who participated in this study.  
28  
29  
30  
31  
32  
33  
34  
35  
36  
37  
38  
39  
40  
41  
42  
43  
44  
45  
46  
47  
48  
49  
50  
51  
52  
53  
54  
55  
56  
57  
58  
59  
60

## REFERENCES

- 1 Rachakonda TD, Schupp CW, Armstrong AW. Psoriasis prevalence among adults in the United States. *J Am Acad Dermatol* 2014;**70**:512–6.
- 2 Bhosle MJ, Kulkarni A, Feldman SR, et al. Quality of life in patients with psoriasis. *Health Qual Life Outcomes* 2006;**4**:35.
- 3 Gelfand JM, Feldman SR, Stern RS, et al. Determinants of quality of life in patients with psoriasis: A study from the US population. *J Am Acad Dermatol* 2004;**51**:704–8.
- 4 Korman NJ, Zhao Y, Pike J, et al. Relationship between psoriasis severity, clinical symptoms, quality of life and work productivity among patients in the USA. *Clin Exp Dermatol* 2016;**41**:514–21.
- 5 Armstrong AW, Schupp C, Wu J, et al. Quality of life and work productivity impairment among psoriasis patients: findings from the National Psoriasis Foundation survey data 2003-2011. *PLoS One* 2012;**7**:e52935.
- 6 Menter A, Gottlieb A, Feldman SR, et al. Guidelines of care for the management of psoriasis and psoriatic arthritis: Section 1. Overview of psoriasis and guidelines of care for the treatment of psoriasis with biologics. *J Am Acad Dermatol* 2008;**58**:826–850.
- 7 Armstrong AW, Siegel MP, Bagel J, et al. From the Medical Board of the National Psoriasis Foundation: Treatment targets for plaque psoriasis. *J Am Acad Dermatol* 2017;**76**:290–8.
- 8 Helmick CG, Lee-Han H, Hirsch SC, et al. Prevalence of psoriasis among adults in the U.S.: 2003-2006 and 2009-2010 National Health and Nutrition Examination Surveys. *Am J Prev Med* 2014;**47**:37–45.
- 9 Langley RG, Feldman SR, Nyirady J, et al. The 5-point Investigator's Global Assessment (IGA) Scale: a modified tool for evaluating plaque psoriasis severity in clinical trials. *J Dermatolog Treat* 2015;**26**:23–31.

- 1  
2  
3 10 Feldman SR, Krueger GG. Psoriasis assessment tools in clinical trials. *Ann Rheum Dis* 2005;  
4  
5 **64 Suppl 2**:ii65–8;discussion ii69–73.  
6  
7  
8 11 Duffin KC, Papp KA, Bagel J, et al. Evaluation of the Physician Global Assessment and  
9  
10 Body Surface Area Composite Tool for assessing psoriasis response to apremilast therapy:  
11  
12 results from ESTEEM 1 and ESTEEM 2. *J Drugs Dermatol* 2017;**16**:147–53.  
13  
14  
15 12 Finlay AY, Khan GK. Dermatology Life Quality Index (DLQI)—a simple practical measure  
16  
17 for routine clinical use. *Clin Exp Dermatol* 1994;**19**:210–6.  
18  
19  
20 13 EuroQol Group. EuroQol—a new facility for the measurement of health-related quality of  
21  
22 life. *Health Policy* 1990;**16**:199–208.  
23  
24  
25 14 Reilly MC, Zbrozek AS, Dukes EM. The validity and reproducibility of a work productivity  
26  
27 and activity impairment instrument. *Pharmacoeconomics* 1993;**4**:353–65.  
28  
29  
30 15 Kimball AB, Pariser D, Yamauchi PS, et al. OBSERVE-5 interim analysis: An observational  
31  
32 postmarketing safety registry of etanercept for the treatment of psoriasis. *J Am Acad Dermatol*  
33  
34 2013;**68**:756–64.  
35  
36  
37 16 Menter A, Thaci D, Papp KA, et al. Five-year analysis from the ESPRIT 10-year  
38  
39 postmarketing surveillance registry of adalimumab treatment for moderate to severe psoriasis. *J*  
40  
41 *Am Acad Dermatol* 2015;**73**:410–9,e416.  
42  
43  
44 17 Strober BE, Bissonnette R, Fiorentino D, et al. Comparative effectiveness of biologic agents  
45  
46 for the treatment of psoriasis in a real-world setting: results from a large, prospective,  
47  
48 observational study (Psoriasis Longitudinal Assessment and Registry [PSOLAR]). *J Am Acad*  
49  
50 *Dermatol* 2016;**74**:851-861,e854.  
51  
52  
53 18 Huynh DH, Boyd TA, Etzel CJ, et al. Persistence of low disease activity after tumour  
54  
55 necrosis factor inhibitor (TNFi) discontinuation in patients with psoriatic arthritis. *RMD Open*  
56  
57 2017;**3**:e000395.  
58  
59  
60

- 1  
2  
3 19 Lindstrom Egholm C, Krogh NS, Pincus T, *et al.* Discordance of global assessments by  
4 patient and physician is higher in female than in male patients regardless of the physician's sex:  
5 data on patients with rheumatoid arthritis, axial spondyloarthritis, and psoriatic arthritis from the  
6 DANBIO registry. *J Rheumatol* 2015;**42**:1781–5.  
7  
8  
9  
10  
11  
12 20 Daudén E, Pujol RM, Sanchez-Carazo JL, *et al.* Demographic characteristics and health-  
13 related quality of life of patients with moderate-to-severe psoriasis: the VACAP study. *Actas*  
14 *Dermosifiliogr* 2013;**104**:807–14.  
15  
16  
17  
18  
19 21 Mrowietz U, Kragballe K, Reich K, *et al.* Definition of treatment goals for moderate to  
20 severe psoriasis: a European consensus. *Arch Dermatol Res* 2011;**303**:1–10.  
21  
22  
23  
24 22 Lewis-Beck C, Abouzaid S, Xie L, *et al.* Analysis of the relationship between psoriasis  
25 symptom severity and quality of life, work productivity, and activity impairment among patients  
26 with moderate-to-severe psoriasis using structural equation modeling. *Patient Prefer Adherence*  
27  
28  
29  
30  
31  
32  
33  
34  
35  
36  
37  
38  
39  
40  
41  
42  
43  
44  
45  
46  
47  
48  
49  
50  
51  
52  
53  
54  
55  
56  
57  
58  
59  
60

## FIGURES

### **Figure 1A and 1B. Patient-reported Symptoms by BSA Severity Group (A) and IGA Severity Group (B)**

Fatigue, itch, and pain symptom scale: 0–100.

BSA, Body surface area; IGA, Investigator's Global Assessment; VAS, visual analogue scale.

### **Figure 2A and 2B. DLQI Scores by BSA Severity Group (A) and IGA Severity Group (B)**

DLQI scale: 0–30.

DLQI, Dermatology Life Quality Index; BSA, body surface area; IGA, Investigator's Global Assessment.

### **Figure 3A and 3B. EQ-VAS by BSA Severity Group (A) and IGA Severity Group (B)**

EQ-VAS scale: 0–100.

EQ-VAS, EuroQoL visual analog scale; BSA, body surface area; IGA, Investigator's Global Assessment; VAS, visual analog scale.

### **Figure 4A and 4B. WPAI Domains by BSA Severity Group (A) and IGA Severity Group (B)**

WPAI, Work Productivity and Activity Impairment; BSA, body surface area; IGA, Investigator's Global Assessment.

(a)

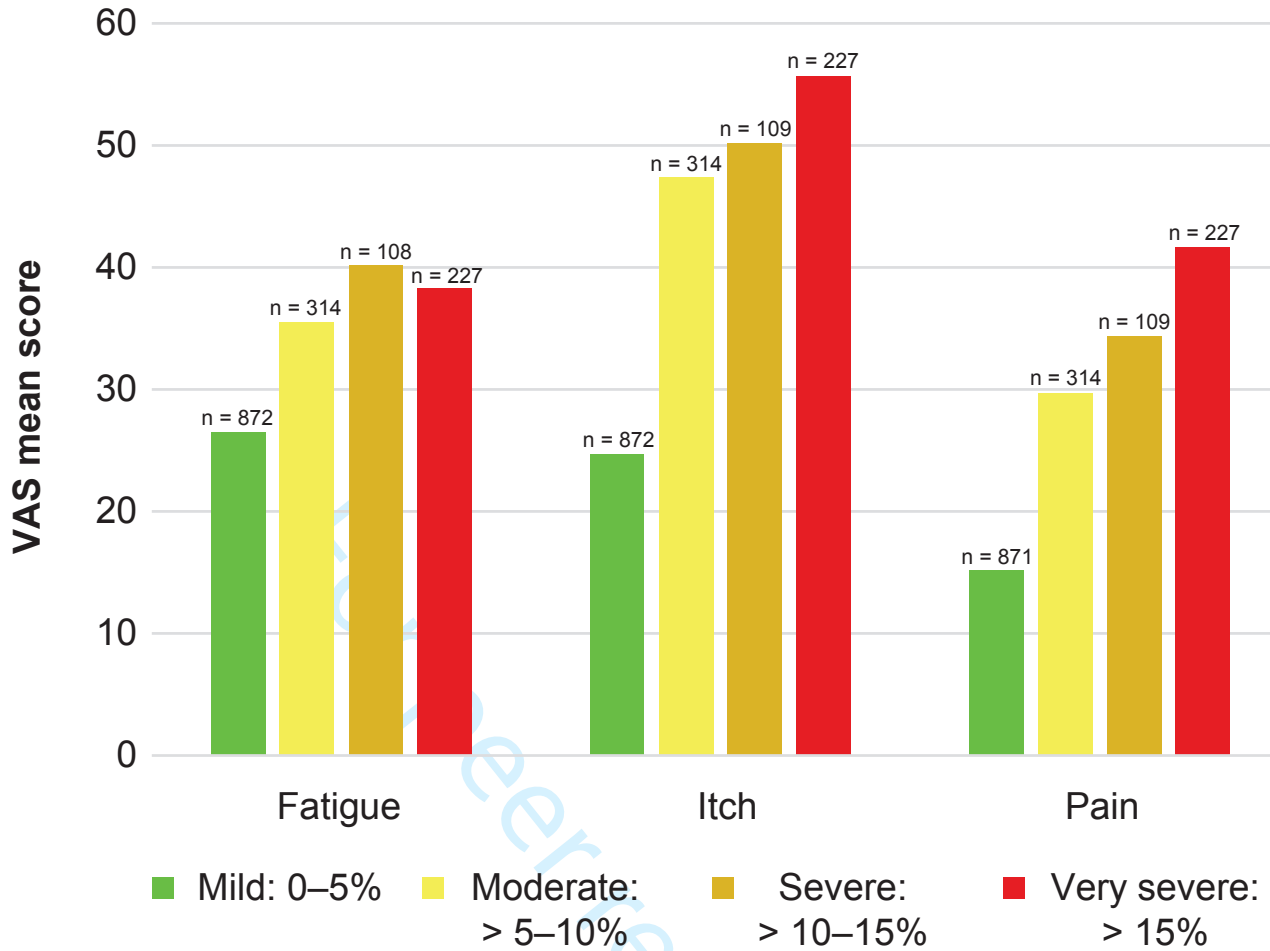

(b)



For peer review only - <http://bmjopen.bmj.com/site/about/guidelines.xhtml>

(a)

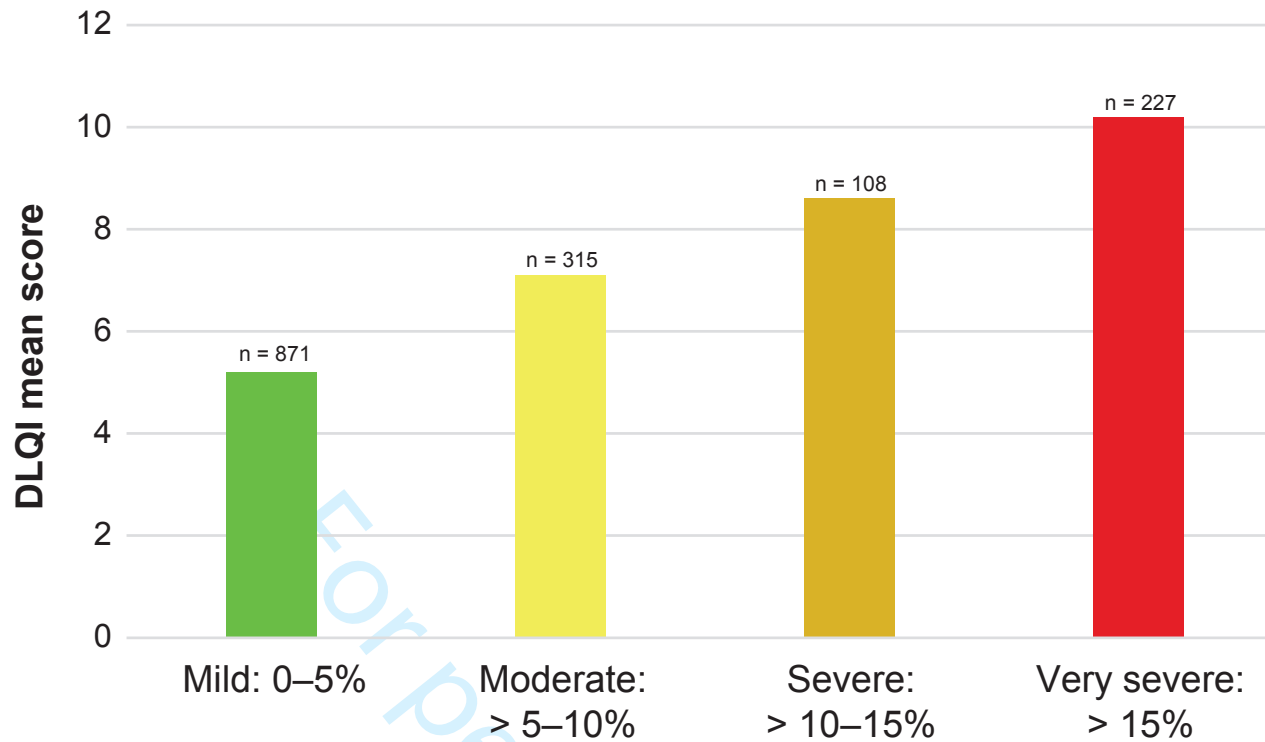

(b)

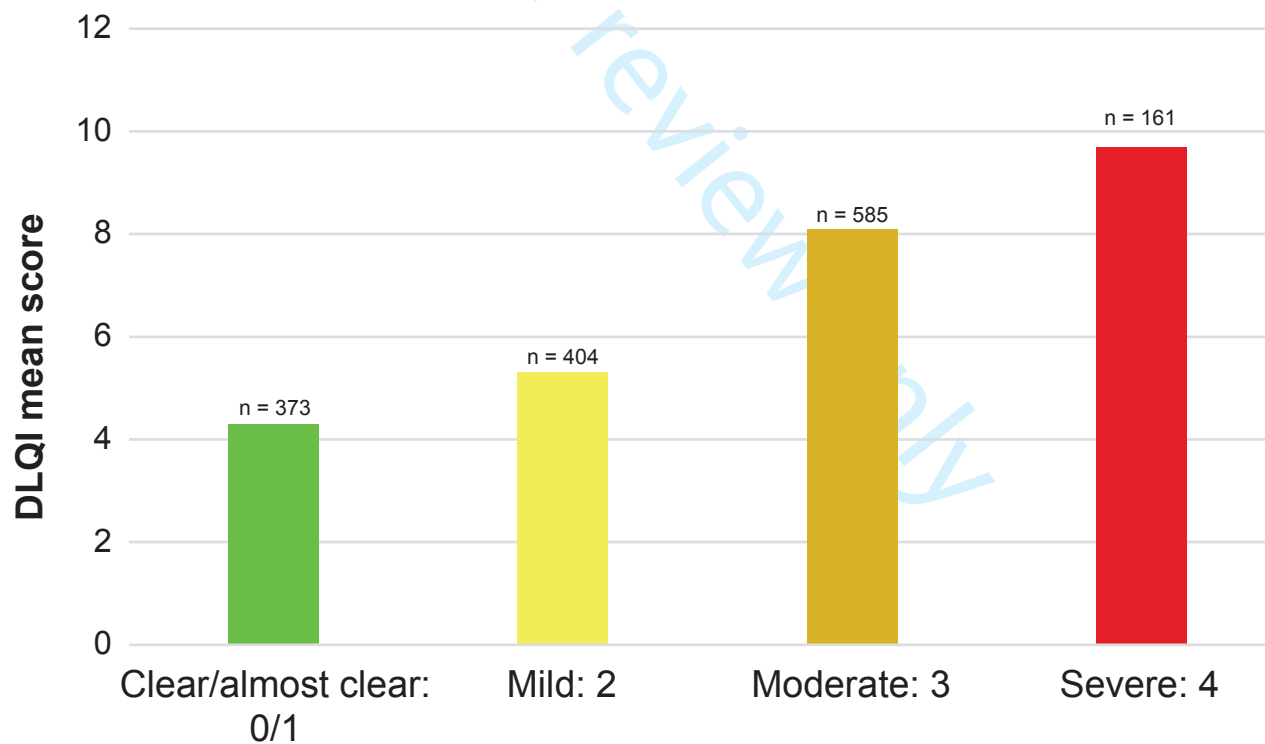

(a)



(b)







(b)



**Supplementary Table 1. Proportional odds model results for specific PROs by BSA and IGA severity covariates**

|                                                          | Severity measured by BSA | Severity measured by IGA |
|----------------------------------------------------------|--------------------------|--------------------------|
| <b>Odds Ratio (95% CI)</b>                               |                          |                          |
| <b>Symptoms</b>                                          |                          |                          |
| <b>Fatigue</b>                                           |                          |                          |
| None vs (Mild, Moderate, Severe, Very Severe)            | 1.01 (1.00, 1.02)        | 1.19 (1.07, 1.33)        |
| (None, Mild) vs (Moderate, Severe, Very Severe)          | 1.02 (1.01, 1.03)        | 1.44 (1.31, 1.58)        |
| (None, Mild, Moderate) vs (Severe, Very Severe)          | 1.03 (1.02, 1.04)        | 1.46 (1.33, 1.61)        |
| (None, Mild, Moderate, Severe) vs Very Severe            | 1.02 (1.02, 1.03)        | 1.43 (1.27, 1.61)        |
| <b>Itch</b>                                              |                          |                          |
| None vs (Mild, Moderate, Severe, Very Severe)            | 1.10 (1.07, 1.13)        | 2.69 (2.45, 2.95)*       |
| (None, Mild) vs (Moderate, Severe, Very Severe)          | 1.09 (1.07, 1.11)        |                          |
| (None, Mild, Moderate) vs (Severe, Very Severe)          | 1.06 (1.04, 1.07)        |                          |
| (None, Mild, Moderate, Severe) vs Very Severe            | 1.05 (1.04, 1.06)        |                          |
| <b>Pain</b>                                              |                          |                          |
| None vs (Mild, Moderate, Severe, Very Severe)            | 1.06 (1.04, 1.07)        | 1.89 (1.71, 2.10)        |
| (None, Mild) vs (Moderate, Severe, Very Severe)          | 1.06 (1.05, 1.08)        | 2.21 (1.99, 2.46)        |
| (None, Mild, Moderate) vs (Severe, Very Severe)          | 1.06 (1.05, 1.07)        | 2.44 (2.15, 2.77)        |
| (None, Mild, Moderate, Severe) vs Very Severe            | 1.04 (1.03, 1.05)        | 2.48 (2.11, 2.91)        |
| <b>DLQI</b>                                              |                          |                          |
| None vs (Small, Moderate, Very Large, Extremely Large)   | 1.09 (1.07, 1.12)        | 2.24 (1.99, 2.52)        |
| (None, Small) vs (Moderate, Very Large, Extremely Large) | 1.06 (1.05, 1.08)        | 1.85 (1.66, 2.06)        |
| (None, Small, Moderate) vs (Very Large, Extremely Large) | 1.04 (1.03, 1.05)        | 1.57 (1.40, 1.77)        |
| (None, Small, Moderate, Very Large) vs Extremely Large   | 1.03 (1.01, 1.04)        | 1.27 (1.01, 1.59)        |
| <b>EQ-VAS</b>                                            | 0.97 (0.97, 0.98)*       | 0.71 (0.66, 1.78)*       |
| <b>WPAI questionnaire</b>                                |                          |                          |
| Work time missed <sup>†</sup>                            | 1.02 (1.00, 1.03)        | 1.45 (1.21, 1.75)        |
| Impairment while working <sup>†</sup>                    | 1.03 (1.02, 1.04)        | 1.51 (1.34, 1.71)        |
| Working hours affected <sup>†</sup>                      | 1.03 (1.02, 1.04)        | 1.51 (1.33, 1.70)        |
| Daily activities affected                                |                          |                          |
| None vs (A Little, A Lot)                                | 1.04 (1.03, 1.04)*       | 1.55 (1.41, 1.70)        |
| (None, A Little) vs A Lot                                |                          | 1.95 (1.68, 2.25)        |

\*Proportional odds assumption was not violated.

<sup>†</sup>Logistic regression model.

Each “vs” comparison implies the “0 vs 1” structure of a traditional logistic regression. The 0 group is the reference.

Fatigue outcome levels (0–100 VAS): 0 = None (0), 1 = Mild (>0 to ≤12), 2 = Moderate (>12 to ≤32), Severe = (>32 to ≤59), Very Severe (>59 to ≤100).

Itch outcome levels (0–100 VAS): 0 = None (0), 1 = Mild (>0 to ≤9), 2 = Moderate (>9 to ≤34), 3 = Severe (>34 to ≤69), Very Severe (>69 to ≤100).

Pain outcome levels (0–100 VAS): 0 = None (0), 1 = Mild (>0 to ≤7), 2 = Moderate (>7 to ≤24), 3 = Severe (>24 to ≤59), Very Severe (>59 to ≤100).

DLQI outcome levels: 0 = None, 1 = Small, 2 = Moderate, 3 = Very Large, 4 = Extremely Large.

EQ-VAS outcome levels: 0 = Poor Health (≥0 to ≤20), 1 = Fair Health (<20 to ≤40), 2 = Good Health (<40 to ≤60), 3 = Very Good Health (<60 to ≤80), 4 = Excellent Health (>80 to ≤100).

WPAI outcome levels for work time missed due to psoriasis, impairment while working due to psoriasis, and working hours affected by psoriasis: 0 = None, 1 = Some (>0 to ≤100).

WPAI outcome levels for daily activities affected by psoriasis: 0 = None (0), 1 = A Little (>0 to <50), 2 = A Lot (≥50 to ≤100).

BSA, body surface area; CI, confidence interval; DLQI, Dermatology Life Quality Index; EQ-VAS, EuroQoL visual analog scale; IGA, Investigator’s Global Assessment, VAS, visual analog scale; WPAI, Work Productivity and Activity Impairment.

## STROBE Statement—checklist of items that should be included in reports of observational studies

|                           | Item No | Recommendation                                                                                                                                                                                                                                                                                                                                                                                                                                                                                                                                                                                                                                                                                                                                                                                |
|---------------------------|---------|-----------------------------------------------------------------------------------------------------------------------------------------------------------------------------------------------------------------------------------------------------------------------------------------------------------------------------------------------------------------------------------------------------------------------------------------------------------------------------------------------------------------------------------------------------------------------------------------------------------------------------------------------------------------------------------------------------------------------------------------------------------------------------------------------|
| <b>Title and abstract</b> | 1       | (a) Indicate the study's design with a commonly used term in the title or the abstract<br><i>The abstract describes the study as a "cross-sectional analysis". Page 1.</i><br>(b) Provide in the abstract an informative and balanced summary of what was done and what was found<br><i>The abstract describes the methods and key findings. Pages 3-4.</i>                                                                                                                                                                                                                                                                                                                                                                                                                                   |
| <b>Introduction</b>       |         |                                                                                                                                                                                                                                                                                                                                                                                                                                                                                                                                                                                                                                                                                                                                                                                               |
| Background/rationale      | 2       | Explain the scientific background and rationale for the investigation being reported<br><i>The background and rationale are described in paragraphs 1-6 of the Introduction. Pages 4-6.</i>                                                                                                                                                                                                                                                                                                                                                                                                                                                                                                                                                                                                   |
| Objectives                | 3       | State specific objectives, including any prespecified hypotheses<br><i>The specific aims of the study are stated in paragraph 7 of the Introduction. Page 6.</i>                                                                                                                                                                                                                                                                                                                                                                                                                                                                                                                                                                                                                              |
| <b>Methods</b>            |         |                                                                                                                                                                                                                                                                                                                                                                                                                                                                                                                                                                                                                                                                                                                                                                                               |
| Study design              | 4       | Present key elements of study design early in the paper<br><i>The study design is described in paragraphs 1-4 and 8-10 of the Methods. Pages 6-10.</i>                                                                                                                                                                                                                                                                                                                                                                                                                                                                                                                                                                                                                                        |
| Setting                   | 5       | Describe the setting, locations, and relevant dates, including periods of recruitment, exposure, follow-up, and data collection<br><i>The setting and patient enrollment are described in paragraph 2 of the Methods. Pages 6-7.</i>                                                                                                                                                                                                                                                                                                                                                                                                                                                                                                                                                          |
| Participants              | 6       | (a) <i>Cohort study</i> —Give the eligibility criteria, and the sources and methods of selection of participants. Describe methods of follow-up<br><i>Case-control study</i> —Give the eligibility criteria, and the sources and methods of case ascertainment and control selection. Give the rationale for the choice of cases and controls<br><i>Cross-sectional study</i> —Give the eligibility criteria, and the sources and methods of selection of participants<br><i>The selection of the sample is described in paragraph 3 of the Methods. Pages 6-7.</i><br>(b) <i>Cohort study</i> —For matched studies, give matching criteria and number of exposed and unexposed<br><i>Case-control study</i> —For matched studies, give matching criteria and the number of controls per case |
| Variables                 | 7       | Clearly define all outcomes, exposures, predictors, potential confounders, and effect modifiers. Give diagnostic criteria, if applicable<br><i>Outcomes and exposures are described in the Study Measures subsection, paragraphs 4-7 of the Methods. Pages 7-8.</i>                                                                                                                                                                                                                                                                                                                                                                                                                                                                                                                           |
| Data sources/measurement  | 8*      | For each variable of interest, give sources of data and details of methods of assessment (measurement). Describe comparability of assessment methods if there is more than one group<br><i>The source of the data is reported in paragraph 3 of the Methods. Pages 6-7.</i>                                                                                                                                                                                                                                                                                                                                                                                                                                                                                                                   |
| Bias                      | 9       | Describe any efforts to address potential sources of bias<br><i>Multivariable regression modeling provided a method to address potential confounding variables, described in paragraph 9 of the Methods. Page 9.</i>                                                                                                                                                                                                                                                                                                                                                                                                                                                                                                                                                                          |

|    |                        |     |                                                                                                       |
|----|------------------------|-----|-------------------------------------------------------------------------------------------------------|
| 1  |                        |     |                                                                                                       |
| 2  | Study size             | 10  | Explain how the study size was arrived at                                                             |
| 3  |                        |     | <i>Not applicable; because this was a secondary analysis, study size was dependent on</i>             |
| 4  |                        |     | <i>enrollment in the original registry study that was the source of the data</i>                      |
| 5  |                        |     |                                                                                                       |
| 6  | Quantitative variables | 11  | Explain how quantitative variables were handled in the analyses. If applicable,                       |
| 7  |                        |     | describe which groupings were chosen and why                                                          |
| 8  |                        |     | <i>Quantitative variables, including categories for categorical variables and ranges</i>              |
| 9  |                        |     | <i>for continuous variables, are described in paragraphs 3-7 of the Methods. Pages 6-</i>             |
| 10 |                        |     | <i>8.</i>                                                                                             |
| 11 |                        |     |                                                                                                       |
| 12 | Statistical methods    | 12  | (a) Describe all statistical methods, including those used to control for confounding                 |
| 13 |                        |     | <i>Statistical methods are described in the Statistical Analysis subsection (paragraphs</i>           |
| 14 |                        |     | <i>8-10 of the Methods). Page 9.</i>                                                                  |
| 15 |                        |     |                                                                                                       |
| 16 |                        |     | (b) Describe any methods used to examine subgroups and interactions                                   |
| 17 |                        |     | <i>Not applicable</i>                                                                                 |
| 18 |                        |     |                                                                                                       |
| 19 |                        |     | (c) Explain how missing data were addressed                                                           |
| 20 |                        |     | <i>There were virtually no missing data in the dataset because variables of interest</i>              |
| 21 |                        |     | <i>were specified as “required” during data collection. This is described in paragraph</i>            |
| 22 |                        |     | <i>10 of the Methods. Page 9.</i>                                                                     |
| 23 |                        |     |                                                                                                       |
| 24 |                        |     | (d) <i>Cohort study</i> —If applicable, explain how loss to follow-up was addressed                   |
| 25 |                        |     | <i>Case-control study</i> —If applicable, explain how matching of cases and controls was              |
| 26 |                        |     | addressed                                                                                             |
| 27 |                        |     | <i>Cross-sectional study</i> —If applicable, describe analytical methods taking account of            |
| 28 |                        |     | sampling strategy                                                                                     |
| 29 |                        |     | <i>Not applicable; this was a secondary analysis of registry data</i>                                 |
| 30 |                        |     |                                                                                                       |
| 31 |                        |     | (e) Describe any sensitivity analyses                                                                 |
| 32 |                        |     | <i>Sensitivity analysis is described in paragraph 9 of the Methods. Page 9.</i>                       |
| 33 |                        |     |                                                                                                       |
| 34 | <b>Results</b>         |     |                                                                                                       |
| 35 | Participants           | 13* | (a) Report numbers of individuals at each stage of study—eg numbers potentially eligible,             |
| 36 |                        |     | examined for eligibility, confirmed eligible, included in the study, completing follow-up, and        |
| 37 |                        |     | analysed                                                                                              |
| 38 |                        |     | <i>The number of eligible patients is reported in paragraph 1 of the Results. Because this is a</i>   |
| 39 |                        |     | <i>secondary analysis, details of the numbers of patients at each stage of the study is described</i> |
| 40 |                        |     | <i>in a previous publication. Page 10.</i>                                                            |
| 41 |                        |     |                                                                                                       |
| 42 |                        |     | (b) Give reasons for non-participation at each stage                                                  |
| 43 |                        |     |                                                                                                       |
| 44 |                        |     | (c) Consider use of a flow diagram                                                                    |
| 45 |                        |     |                                                                                                       |
| 46 | Descriptive data       | 14* | (a) Give characteristics of study participants (eg demographic, clinical, social) and                 |
| 47 |                        |     | information on exposures and potential confounders                                                    |
| 48 |                        |     | <i>Descriptive data are presented in paragraphs 1-2 of the Results and in Table 1. Pages 10-15.</i>   |
| 49 |                        |     | (b) Indicate number of participants with missing data for each variable of interest                   |
| 50 |                        |     | <i>The number of participants with complete data is reported in paragraph 1 of the Results.</i>       |
| 51 |                        |     | <i>Page 10.</i>                                                                                       |
| 52 |                        |     |                                                                                                       |
| 53 |                        |     | (c) <i>Cohort study</i> —Summarise follow-up time (eg, average and total amount)                      |
| 54 |                        |     |                                                                                                       |
| 55 | Outcome data           | 15* | <i>Cohort study</i> —Report numbers of outcome events or summary measures over time                   |
| 56 |                        |     | <i>Case-control study</i> —Report numbers in each exposure category, or summary measures of           |
| 57 |                        |     | exposure                                                                                              |
| 58 |                        |     | <i>Cross-sectional study</i> —Report numbers of outcome events or summary measures                    |
| 59 |                        |     | <i>Patient-reported outcome measures ranges, stratified by disease severity, are reported in</i>      |
| 60 |                        |     | <i>subsection Patient-Reported Outcomes Descriptive Analysis Results (paragraph 3 of the</i>          |

1  
2  
3  
4  
5  
6  
7  
8  
9  
10  
11  
12  
13  
14  
15  
16  
17  
18  
19  
20  
21  
22  
23  
24  
25  
26  
27  
28  
29  
30  
31  
32  
33  
34  
35  
36  
37  
38  
39  
40  
41  
42  
43  
44  
45  
46  
47  
48  
49  
50  
51  
52  
53  
54  
55  
56  
57  
58  
59  
60*Results). Page 15.*

|                          |    |                                                                                                                                                                                                                                                                                                                                                                                                                   |
|--------------------------|----|-------------------------------------------------------------------------------------------------------------------------------------------------------------------------------------------------------------------------------------------------------------------------------------------------------------------------------------------------------------------------------------------------------------------|
| Main results             | 16 | (a) Give unadjusted estimates and, if applicable, confounder-adjusted estimates and their precision (eg, 95% confidence interval). Make clear which confounders were adjusted for and why they were included<br><i>Confounder-adjusted estimates with 95% confidence intervals are reported in the subsection Multivariable Linear Regression Model (paragraphs 4-5 of the Results) and Table 2. Pages 16-19.</i> |
|                          |    | (b) Report category boundaries when continuous variables were categorized<br><i>Category boundaries for independent variables are reported in paragraph 4 of the Methods. Dependent variables were continuous. Page 7.</i>                                                                                                                                                                                        |
|                          |    | (c) If relevant, consider translating estimates of relative risk into absolute risk for a meaningful time period<br><i>Not applicable</i>                                                                                                                                                                                                                                                                         |
| Other analyses           | 17 | Report other analyses done—eg analyses of subgroups and interactions, and sensitivity analyses<br><i>The sensitivity analysis is described in the Sensitivity Analysis subsection, paragraph 7 of the Results. Page 19.</i>                                                                                                                                                                                       |
| <b>Discussion</b>        |    |                                                                                                                                                                                                                                                                                                                                                                                                                   |
| Key results              | 18 | Summarise key results with reference to study objectives<br><i>Key results are summarized in paragraph 1 of the Discussion. Page 20.</i>                                                                                                                                                                                                                                                                          |
| Limitations              | 19 | Discuss limitations of the study, taking into account sources of potential bias or imprecision. Discuss both direction and magnitude of any potential bias<br><i>Study limitations are discussed in paragraphs 4-5 of the Discussion. Page 22.</i>                                                                                                                                                                |
| Interpretation           | 20 | Give a cautious overall interpretation of results considering objectives, limitations, multiplicity of analyses, results from similar studies, and other relevant evidence<br><i>Interpretation of the results in the context of similar studies is discussed in paragraphs 2-3 of the Discussion. Pages 20-21.</i>                                                                                               |
| Generalisability         | 21 | Discuss the generalisability (external validity) of the study results<br><i>External validity of the study results is discussed in paragraph 5 of the Discussion. Page 22.</i>                                                                                                                                                                                                                                    |
| <b>Other information</b> |    |                                                                                                                                                                                                                                                                                                                                                                                                                   |
| Funding                  | 22 | Give the source of funding and the role of the funders for the present study and, if applicable, for the original study on which the present article is based<br><i>Study funding is reported in the Footnotes section at the end of the manuscript. Page 23.</i>                                                                                                                                                 |

\*Give information separately for cases and controls in case-control studies and, if applicable, for exposed and unexposed groups in cohort and cross-sectional studies.

**Note:** An Explanation and Elaboration article discusses each checklist item and gives methodological background and published examples of transparent reporting. The STROBE checklist is best used in conjunction with this article (freely available on the Web sites of PLoS Medicine at <http://www.plosmedicine.org/>, Annals of Internal Medicine at <http://www.annals.org/>, and Epidemiology at <http://www.epidem.com/>). Information on the STROBE Initiative is available at [www.strobe-statement.org](http://www.strobe-statement.org).
