# Supplementary material for: Impact of psoriasis severity on patient-reported clinical symptoms, health-related quality of life and work productivity among US patients: real-world data from the Corrona Psoriasis Registry
Source: PubMed Central journal article supplement — BMJ Open. 2019 Apr 20;9(4):e027535. doi: 10.1136/bmjopen-2018-027535 (PMC6500315; doi:10.1136/bmjopen-2018-027535), 2019-04-20
Supplement: bmjopen-2018-027535supp001.pdf [file bmjopen-2018-027535supp001.pdf]

**Supplementary Table 1. Proportional odds model results for specific PROs by BSA and IGA severity covariates**

|                                                          | Severity measured by BSA | Severity measured by IGA |
|----------------------------------------------------------|--------------------------|--------------------------|
| <b>Odds Ratio (95% CI)</b>                               |                          |                          |
| <b>Symptoms</b>                                          |                          |                          |
| <b>Fatigue</b>                                           |                          |                          |
| None vs (Mild, Moderate, Severe, Very Severe)            | 1.01 (1.00, 1.02)        | 1.19 (1.07, 1.33)        |
| (None, Mild) vs (Moderate, Severe, Very Severe)          | 1.02 (1.01, 1.03)        | 1.44 (1.31, 1.58)        |
| (None, Mild, Moderate) vs (Severe, Very Severe)          | 1.03 (1.02, 1.04)        | 1.46 (1.33, 1.61)        |
| (None, Mild, Moderate, Severe) vs Very Severe            | 1.02 (1.02, 1.03)        | 1.43 (1.27, 1.61)        |
| <b>Itch</b>                                              |                          |                          |
| None vs (Mild, Moderate, Severe, Very Severe)            | 1.10 (1.07, 1.13)        | 2.69 (2.45, 2.95)*       |
| (None, Mild) vs (Moderate, Severe, Very Severe)          | 1.09 (1.07, 1.11)        |                          |
| (None, Mild, Moderate) vs (Severe, Very Severe)          | 1.06 (1.04, 1.07)        |                          |
| (None, Mild, Moderate, Severe) vs Very Severe            | 1.05 (1.04, 1.06)        |                          |
| <b>Pain</b>                                              |                          |                          |
| None vs (Mild, Moderate, Severe, Very Severe)            | 1.06 (1.04, 1.07)        | 1.89 (1.71, 2.10)        |
| (None, Mild) vs (Moderate, Severe, Very Severe)          | 1.06 (1.05, 1.08)        | 2.21 (1.99, 2.46)        |
| (None, Mild, Moderate) vs (Severe, Very Severe)          | 1.06 (1.05, 1.07)        | 2.44 (2.15, 2.77)        |
| (None, Mild, Moderate, Severe) vs Very Severe            | 1.04 (1.03, 1.05)        | 2.48 (2.11, 2.91)        |
| <b>DLQI</b>                                              |                          |                          |
| None vs (Small, Moderate, Very Large, Extremely Large)   | 1.09 (1.07, 1.12)        | 2.24 (1.99, 2.52)        |
| (None, Small) vs (Moderate, Very Large, Extremely Large) | 1.06 (1.05, 1.08)        | 1.85 (1.66, 2.06)        |
| (None, Small, Moderate) vs (Very Large, Extremely Large) | 1.04 (1.03, 1.05)        | 1.57 (1.40, 1.77)        |
| (None, Small, Moderate, Very Large) vs Extremely Large   | 1.03 (1.01, 1.04)        | 1.27 (1.01, 1.59)        |
| <b>EQ-VAS</b>                                            | 0.97 (0.97, 0.98)*       | 0.71 (0.66, 1.78)*       |
| <b>WPAI questionnaire</b>                                |                          |                          |
| Work time missed <sup>†</sup>                            | 1.02 (1.00, 1.03)        | 1.45 (1.21, 1.75)        |
| Impairment while working <sup>†</sup>                    | 1.03 (1.02, 1.04)        | 1.51 (1.34, 1.71)        |
| Working hours affected <sup>†</sup>                      | 1.03 (1.02, 1.04)        | 1.51 (1.33, 1.70)        |
| Daily activities affected                                |                          |                          |
| None vs (A Little, A Lot)                                | 1.04 (1.03, 1.04)*       | 1.55 (1.41, 1.70)        |
| (None, A Little) vs A Lot                                |                          | 1.95 (1.68, 2.25)        |

\*Proportional odds assumption was not violated.

<sup>†</sup>Logistic regression model.

Each “vs” comparison implies the “0 vs 1” structure of a traditional logistic regression. The 0 group is the reference.

Fatigue outcome levels (0–100 VAS): 0 = None (0), 1 = Mild (>0 to ≤12), 2 = Moderate (>12 to ≤32), Severe = (>32 to ≤59), Very Severe (>59 to ≤100).

Itch outcome levels (0–100 VAS): 0 = None (0), 1 = Mild (>0 to ≤9), 2 = Moderate (>9 to ≤34), 3 = Severe (>34 to ≤69), Very Severe (>69 to ≤100).

Pain outcome levels (0–100 VAS): 0 = None (0), 1 = Mild (>0 to ≤7), 2 = Moderate (>7 to ≤24), 3 = Severe (>24 to ≤59), Very Severe (>59 to ≤100).

DLQI outcome levels: 0 = None, 1 = Small, 2 = Moderate, 3 = Very Large, 4 = Extremely Large.

EQ-VAS outcome levels: 0 = Poor Health (≥0 to ≤20), 1 = Fair Health (<20 to ≤40), 2 = Good Health (<40 to ≤60), 3 = Very Good Health (<60 to ≤80), 4 = Excellent Health (>80 to ≤100).

WPAI outcome levels for work time missed due to psoriasis, impairment while working due to psoriasis, and working hours affected by psoriasis: 0 = None, 1 = Some (>0 to ≤100).

WPAI outcome levels for daily activities affected by psoriasis: 0 = None (0), 1 = A Little (>0 to <50), 2 = A Lot (≥50 to ≤100).

BSA, body surface area; CI, confidence interval; DLQI, Dermatology Life Quality Index; EQ-VAS, EuroQoL visual analog scale; IGA, Investigator’s Global Assessment, VAS, visual analog scale; WPAI, Work Productivity and Activity Impairment.
